# Supplementary material
Source: MDPI journal article supplement (https://www.mdpi.com/2071-1050/8/10/981)
Supplement: s1 [file s1]

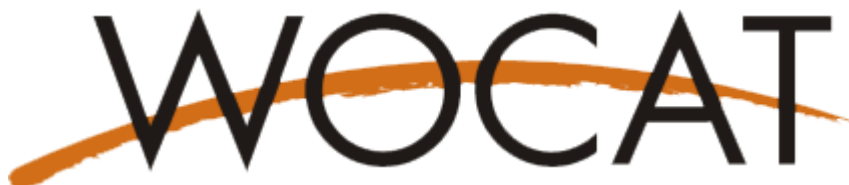

WORLD OVERVIEW OF CONSERVATION APPROACHES AND TECHNOLOGIES

A Framework for  
Documentation and Evaluation of  
Sustainable Land Management

# TECHNOLOGIES

*B*  
basic

WOCAT Questionnaire  
Revised 2008

|                        |                      |                      |                      |                      |                      |
|------------------------|----------------------|----------------------|----------------------|----------------------|----------------------|
| <b>Technology Code</b> |                      |                      |                      |                      |                      |
| <b>QT</b>              | <input type="text"/> |
|                        | country code         |                      |                      | consecutive number   |                      |

# WOCAT

## A Framework for Documentation and Evaluation of Sustainable Land Management

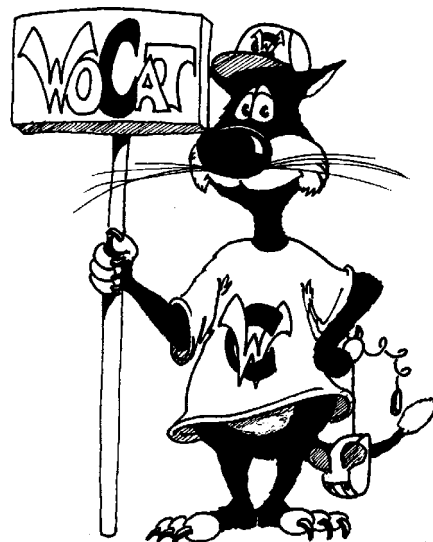

Within the framework of sustainable land management (SLM),

**WOCAT's vision** is that land and livelihoods are improved through sharing and enhancing knowledge about sustainable land management.

**WOCAT's mission** is to support innovation and decision-making processes in sustainable land management, particularly in connection with soil and water conservation (SWC). This is done by:

- connecting stakeholders,
- analysing and synthesising experiences and setting direction,
- enhancing capacity and knowledge,
- developing and applying standardized tools for documenting, monitoring, evaluating, sharing and using knowledge

**WOCAT's target group is SLM specialists:**

- at the field level, including agricultural advisors, project implementers, land users,
- at the (sub-)national level, including planners, project designers, decision makers, researchers,
- at the regional and global levels, including international programme planners, donors.

**Editors:** Hanspeter Liniger, Gudrun Schwilch, Mats Gurtner, Rima Mekdaschi Studer, Christine Hauert, Godert van Lynden and Will Critchley

**Cartoons & Figures:** Karl Herweg, Mats Gurtner

**Proof-reading:** Ted Wachs, Marlène Thibault

**Layout:** Mats Gurtner

**Copyright © 2008** WOCAT

**Coordination:** **WOCAT Global Management**  
CDE - Centre for Development and Environment, Bern, Switzerland;  
FAO - Food and Agriculture Organization of the United Nations, Rome, Italy;  
ISRIC - International Soil Reference and Information Centre, Wageningen, Netherlands;

**Contact address:** **WOCAT, CDE, Hallerstrasse 10, 3012 Bern, Switzerland,**  
Tel +41 31 631 88 22, Fax +41 31 631 85 44, e-mail: [wocat@cde.unibe.ch](mailto:wocat@cde.unibe.ch)  
<http://www.wocat.net>

## Introduction to the questionnaire

**Sustainable Land Management (SLM)** in the context of WOCAT is defined as the use of land resources, including soils, water, animals and plants, for the production of goods to meet changing human needs, while simultaneously ensuring the long-term productive potential of these resources and the maintenance of their environmental functions.

The ultimate goal of this exercise is to improve the effectiveness of SLM by analysing field experience. To achieve this, we need to obtain a better understanding of the reasons behind successful experience with SLM – be it introduced by projects or found in traditional systems. Within SLM WOCAT focuses mainly on efforts to prevent and reduce land degradation through conservation technologies and their implementation approaches.

It is necessary to analyse not only so-called “successful” examples, but also those which may be considered – at least partially – a failure. The reasons for failure are equally important for our analysis.

### Three questionnaires

WOCAT has developed a set of three questionnaires to analyse and evaluate SLM:

- *Questionnaire on SLM Technologies (QT)*
- *Questionnaire on SLM Approaches (QA)*
- *Questionnaire on SLM Mapping (QM)*

**Questionnaire on SLM Technologies (QT):** QT addresses the following questions: **what** are the specifications of the Technology, and **where** is it used (natural and human environment), what impact does it have. The questionnaire consists of three main parts: 1. General information; 2. Specification of SLM Technology; 3. Analysis of SLM Technology.

A **SLM Technology** consists of one or more *conservation measures* belonging to the following categories:

- *agronomic* (eg intercropping, contour cultivation, mulching),
- *vegetative* (eg tree planting, hedge barriers, grass strips),
- *structural* (eg graded banks or bunds, level bench terrace),
- *management* (eg land use change, area closure, rotational grazing).

*Combinations* of above measures which are complimentary and thus enhance each other are part of a SLM Technology.

Criteria for identification and examples of technologies are given in the Questionnaire on SLM Technologies “basic” on page QT1 and QT7.

The **questionnaire on SLM Approaches (QA):** QA addresses the questions of **how** implementation was achieved and **who** achieved it. It is also made up of three main parts: 1. General information; 2. Specification of SLM Approach; 3. Analysis of SLM Approach

A **SLM Approach** defines the ways and means used to promote and implement a SLM Technology and to support it in achieving more sustainable soil and water use. A ‘SLM Approach’ - as defined by WOCAT - refers to a particular land conservation activity, be it an official project/programme, an indigenous system, or changes in a farming system towards more sustainable soil and water use. A SLM Approach consists of the following elements: *All participants* (policy-makers, administrators, experts, technicians, land users, i.e. actors at all levels), *inputs and means* (financial, material, legislative, etc.), and *know-how* (technical, scientific, practical). An Approach may include different *levels of intervention*, from the individual farm, through the community level, the extension / advisory system, the regional or national administration, or the policy level, to the international framework. Besides conservation activities introduced through projects or programmes, WOCAT includes indigenous conservation measures and spontaneous adoptions or adaptations of SLM Technologies. *In the case of a project, we restrict ourselves to those elements within the project that are directly or indirectly relevant to land conservation.*

The **questionnaire on SLM Mapping (QM)** addresses the question of **where** problems and their treatments occur. It is split up into 5 different steps: Contributing specialist; Land Use System; Land degradation per land use system, Land conservation per land use system; Expert recommendation.

The three questionnaires (QT, QA and QM) complement each other. The information obtained from the questionnaires will provide an information base / database for the development and evaluation of SLM. The analysis and evaluation process is based on this information and on the knowledge provided by core groups of SLM specialists and the world community of conservation implementers at large.

### *The basic questionnaire and the modules*

WOCAT has developed a modular questionnaire system in order to meet the needs of different user groups. The “basic questionnaires” on Technologies and Approaches contain the key questions on sustainable land management (SLM), they are the foundation of the WOCAT methodology.

The framework is flexible and open for additional topics (not covered in the standardised WOCAT questionnaires): further modules can thus be added according to specific interests and needs, e.g. modules on “Biodiversity”, “Carbon sequestration”, etc. The realisation of additional modules depends on the initiative of interested partners, who can count on the collaboration of WOCAT.

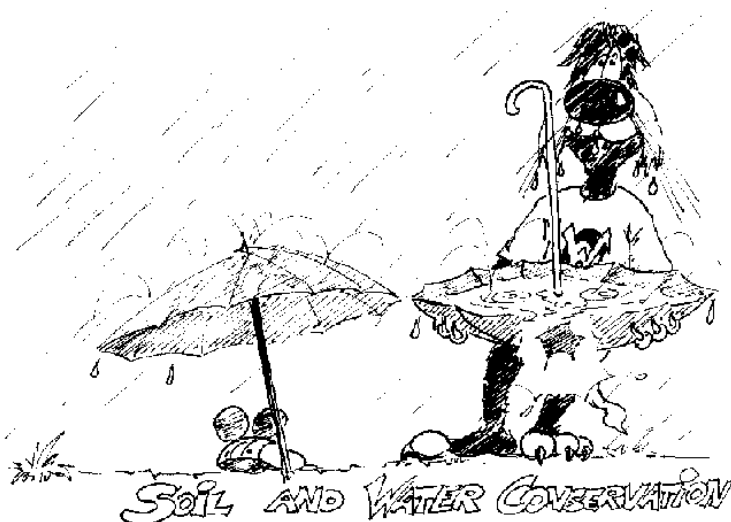

## Please read these notes before filling out the questionnaire!

- It is recommended that the questionnaire be filled in by a **team of SLM specialists** with different backgrounds and experiences who are familiar with the details of the SLM Technology (technical, financial, socio-economic).
- **Don't let the number of pages in this questionnaire discourage you!** In some places the information will be simple to obtain, but in other sections there may be no hard data available. In this latter case, we ask you to provide a best estimate, based on your professional judgment.
- **Shaded parts** in the questionnaire are questions to be filled in, **not shaded parts** are explanations or examples.
- Fill all questions. If information is not available or if certain questions are not applicable always indicate "n/a". Please note that throughout the document the following is valid:

**Square boxes must be ticked!** If 'Several answers possible' is not indicated tick only one box!  
**Make use of the specify/remark/comments column or line as much as possible!**

**Circles always require ranking!** It is possible to give more than one option the same rank, but not necessarily all circles need to be given a number. Use only ranks 1, 2 or 3!

1 = very important / large extent  
2 = important / medium extent  
3 = less important / little extent

- **Make use of existing documents and seek advice from other SLM specialists and land users as much as possible in order to improve the quality of the data. Use this questionnaire as an evaluation tool for your SLM activities. Remember that the quality of the results entirely depends on the quality of your answers.**
- Use the definitions given in this document, even when they deviate from your own/national definitions (e.g. land use, slope classes, etc.)
- If you do not have enough space for answers, use the empty pages at the end of the questionnaire. Please make a footnote in the questionnaire to indicate the exact question number. Please also attach good technical **drawings, photographs descriptions**, references, etc.
- One questionnaire has to be filled out for each Technology and for each Approach. Do not forget to give this questionnaire a code (see cover page of this document and page QT 1).
- The questionnaire was designed to document SLM technologies. However, it can also be used for any land use management practice which may not be declared as a SLM practice. If the objective is to compare situation  $x$  (after or with SLM measures) with  $y$  (before or without SLM measures), fill in two separate questionnaires. The questionnaire on  $x$  has to be filled completely. In the questionnaire on  $y$  only the answers that are different from  $x$  need to be filled. Indicate through the coding that the technologies are related (eg SWI05a and SWI05b).
- An Approach should be linked with one (or several) SLM Technology (ies).
- A Questionnaire on Technologies and a corresponding Questionnaire on Approaches together describe a case study within a selected area
- Please fill out the questionnaire **carefully and legibly**.
- **Please enter the information in the WOCAT online database**, see [www.wocat.net/databs.asp](http://www.wocat.net/databs.asp)

# Contents

|                                                                           | <b>Page</b> |
|---------------------------------------------------------------------------|-------------|
| <b>Introduction</b>                                                       | <b>i-iv</b> |
| <b>Part</b>                                                               |             |
| <b>1 General information</b>                                              |             |
| 1.1 Contributing SLM specialist(s)                                        | QT 1        |
| 1.2 Brief identification of SLM Technology                                | QT 1        |
| 1.3 Area information                                                      | QT 3        |
| <b>2 Specifications of the SLM Technology</b>                             |             |
| 2.1 Description                                                           | QT 4        |
| 2.2 Purpose and classification                                            | QT 7        |
| 2.3 Status                                                                | QT 12       |
| 2.4 Technical drawing                                                     | QT 13       |
| 2.5 Technical specifications, implementation activities, inputs and costs | QT 14       |
| 2.6 Overview of costs                                                     | QT 28       |
| 2.7 Natural environment                                                   | QT 30       |
| 2.8 Human environment and land use                                        | QT 35       |
| <b>3 Analysis of the SLM Technology</b>                                   |             |
| 3.1 Impacts: benefits and disadvantages                                   | QT 42       |
| 3.2 Economic analysis                                                     | QT 48       |
| 3.3 Acceptance or adoption                                                | QT 48       |
| 3.4 Concluding statements                                                 | QT 50       |
| <b>Annex Documentation</b>                                                |             |
| 1 Available documentation                                                 | QT 52       |
| 2 Evaluation of the questionnaire                                         | QT 53       |
| 3 Additional information                                                  | QT 54       |
| 4 Causes of degradation                                                   | QT 57       |

# PART 1: GENERAL INFORMATION

## 1.1 Contributing SLM specialist(s)

*If several SLM specialists are involved, write the name of the main resource person and his / her institution below and add the other person(s) details in the Annex 1.*

Last name / surname: ..... First name(s): ..... female   
 ..... male

**Current institution and address:**

Name of institution: .....

Address of institution: .....

Postal Code: ..... City: .....

State or District: ..... Country: .....

Tel: ..... Fax: ..... E-mail: .....

**Permanent address:** .....

Postal Code: ..... City: .....

State or District: ..... Country: .....

**Please confirm that institutions, projects, etc. referred to, have no objections to the use and dissemination of this information by WOCAT.**

Date: ..... Signature: .....

## 1.2 Brief identification of SLM Technology (see introduction, page i)

Country: .....

Technology code: 

|  |  |  |  |  |  |
|--|--|--|--|--|--|
|  |  |  |  |  |  |
|--|--|--|--|--|--|

*Technology code: boxes 1-3: country code; boxes 4-6: consecutive number; will be assigned automatically when entering questionnaire information in the database*

### 1.2.1 Common name of SLM Technology: .....

*Do not use generic names but be more specific to ensure that the Technology can be distinguished from similar ones (easier identification).*

### 1.2.2 Local or other name(s) (with language) .....

.....

**Criteria for the identification and delineation of a Technology:**

A **single SLM Technology** should cover a homogeneous set of natural (bio-physical) and human (socio-economic) conditions, hence should not be applied for instance to very dissimilar climatic or altitudinal zones or slope categories or to very dissimilar conditions of land tenure.

**Main criteria for a natural (bio-physical) environment:**

- only one of the following land use types: cropland (separate annual, perennial, tree/shrub crops), grazing land (extensive, intensive grazing), forest/woodland, mixed or other land
- only one or a clearly defined combination of the following measures: agronomic, vegetative, structural, management
- one or a combination of two adjacent climatic zones: humid, subhumid, semi-arid, arid
- one or a combination of two adjacent slope categories: flat, gentle, moderate, rolling, hilly, steep, very steep
- one or a combination of two soil texture classes: sand, loam, clay
- one or a combination of two soil depth categories: shallow, medium, deep

**Main criteria for a human (socio-economic) environment:**

- a defined level of mechanisation: hand tools, animal-drawn implements, motorised
- a defined production system: self supply (subsistence), mixed, or market-oriented (commercial)
- a defined level of inputs (costs) that are required
- a defined system of land ownership / land use rights

A single Technology can consist of one or a **combination of land conservation measures** (agronomic, vegetative, structural or management measures). Example: Terraces combined with grass strips and contour ploughing. If a Technology is documented from the perspective of a single land user, it is only assessed for the specific Technology area, even though the same Technology may be used by other land users and covers a broader area. If a Technology is documented from the perspective of a group of land users / a broader area (eg of a project/programme), it is based on the experience of a SLM specialist including the various land users.

**1.2.3 Is the Technology described in this questionnaire part of a ‘watershed system’?**

Yes  No

**If yes, fill a questionnaire for each Technology plus the module ‘watershed system’**

**Watershed system:**

- joint functioning of various technologies as one system in a watershed, i.e. the impact aimed at can only be achieved by combining and integrating these technologies. Often a combination of technologies covering an area (eg mulching, terracing) with technologies situated along drainage lines / waterways (eg check dams, sediment traps, water dams)
- the different technologies are often positioned in a sequence in the landscape (toposequence, defined by waterflow; up-/downstream, reservoir), eg in a watershed / catchment

**Examples**

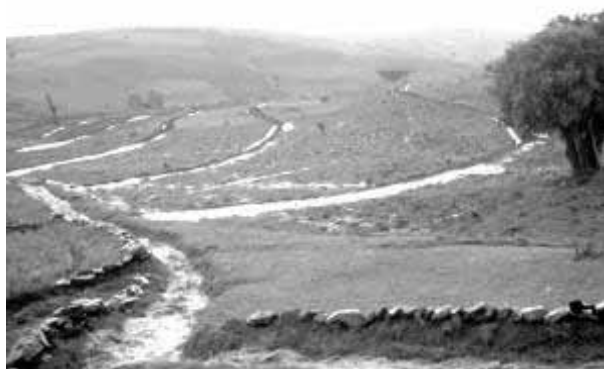

Graded bund and ditch below with drainage channels. Excess water needs to be drained and channelled without causing damage. Anjeni, Ethiopia. (Photo: Hans Hurni)

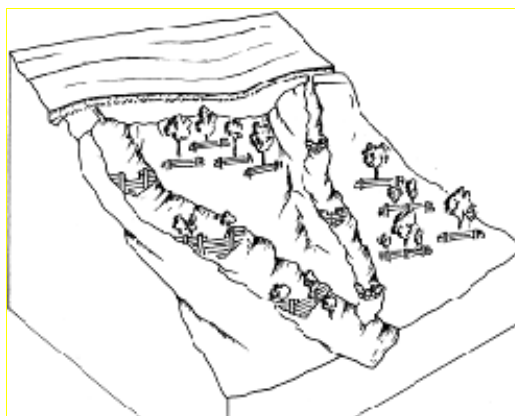

Gully control and catchment protection with integrated measures such as cut-off drains, wooden check dams, stone check dams and staggered structures for tree planting. Cochabamba, Bolivia. (Drawing: Mats Gurtner)

**1.2.4 To understand properly the implementation of the SLM Technology, the associated SLM Approach needs to be described. Indicate the Approach or Approaches described in the WOCAT Questionnaire on SLM Approaches’ (QA).**

|                       |         |                     |
|-----------------------|---------|---------------------|
| Name of SLM Approach: | Author: | Questionnaire code: |
| 1. ....               | .....   | QA ___   ___        |
| 2. ....               | .....   | QA ___   ___        |



### 1.3 Area information

#### 1.3.1 Define the area in which the SLM Technology has been applied

State / Province: ..... District / Commune: .....

Total SLM Technology area: .....km<sup>2</sup>

If precise area is not known, indicate approximately.

- |                               |                          |                                                |                          |
|-------------------------------|--------------------------|------------------------------------------------|--------------------------|
| < 0.1 km <sup>2</sup> (10 ha) | <input type="checkbox"/> | 100 km <sup>2</sup> - 1,000 km <sup>2</sup>    | <input type="checkbox"/> |
| 0.1 - 1 km <sup>2</sup>       | <input type="checkbox"/> | 1,000 km <sup>2</sup> - 10,000 km <sup>2</sup> | <input type="checkbox"/> |
| 1 - 10 km <sup>2</sup>        | <input type="checkbox"/> | > 10,000 km <sup>2</sup>                       | <input type="checkbox"/> |
| 10 - 100 km <sup>2</sup>      | <input type="checkbox"/> |                                                |                          |

Comments: .....  
 .....  
 .....  
 .....

**Square boxes must be ticked!** If 'Several answers possible' is not indicated tick only one box!  
**Make use of the specify/remark/comments column or line as much as possible!**

**SLM Technology area:** The area where SLM Technology is already implemented. It includes both the area occupied by conservation measures and the additional area protected by them (eg the area between structures or vegetation strips). Limit to the area for which you have detailed information or particular knowledge (based on research / projects). Also remember that the information given in the questionnaire should relate to a homogeneous area as defined in 'criteria for Technology' QT 2).

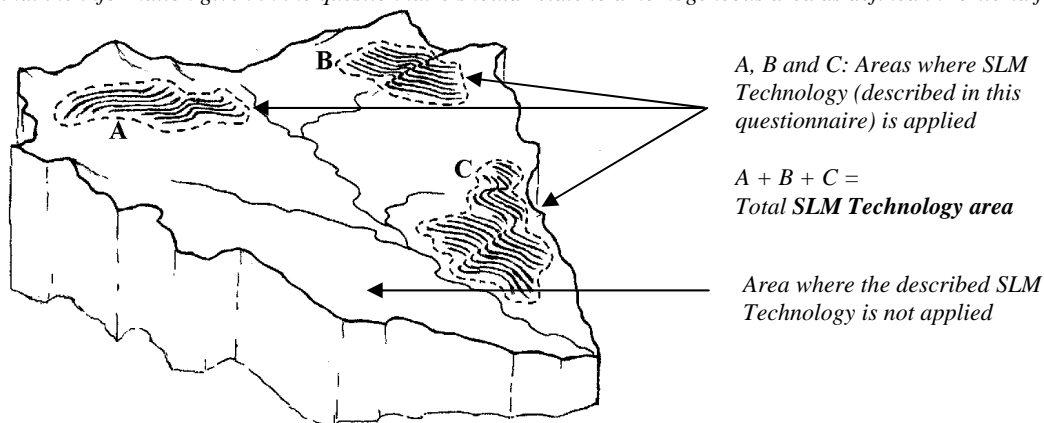

#### 1.3.2 Provide the coordinates in latitude and longitude of the center of the SLM Technology area.

It is also possible to indicate boundary points to delineate the SLM Technology area or provide a GoogleEarth .kmz file (containing a 'placemark' or a 'polygon').

Centre latitude: \_\_\_\_\_ Centre longitude: \_\_\_\_\_

Outline boundary points or GoogleEarth file: \_\_\_\_\_

GoogleEarth: download free version from <http://earth.google.com/>





**2.1.3 Provide photos showing an overview and details of the Technology:**

*Provide at least two photos. Explanation (description) is required for each photo submitted!  
Photos should be of high quality. Highest possible resolution is required for digital photos.  
Photos should match the description given in 2.1.2 and help illustrate the technical drawing in 2.4.  
Where appropriate, photos should depict the before and after or with and without conservation measures situation.  
Good photos are crucial for understanding and illustrating the main feature of the Technology.*

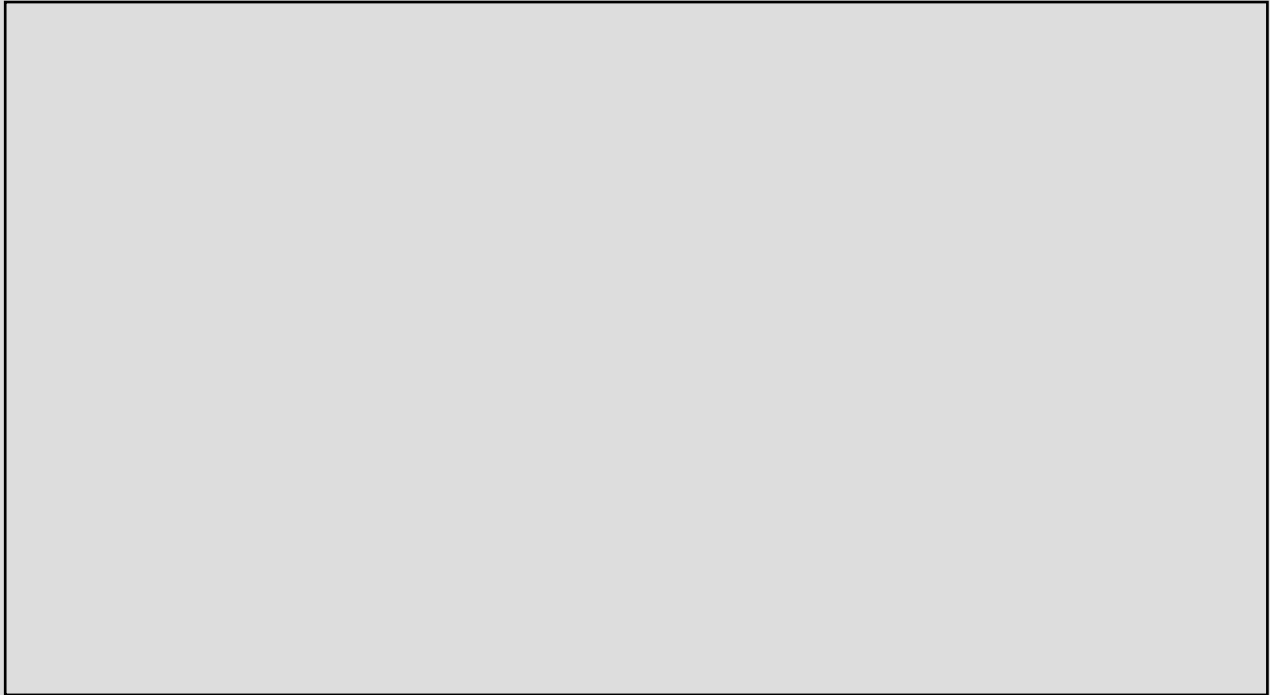

**Explanation of photo:**

Description: .....  
.....  
.....

Location: ..... Distr./Prov./State: ..... Date: .....

Author: ..... Address: .....

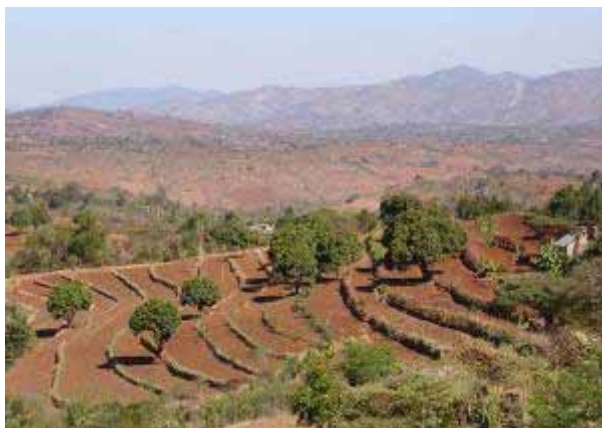

*Example: Fanya juu terraces in semi-arid area which have grass strip developed into benches.(Machakos, Kenya)  
(Photos: Hanspeter Liniger)*

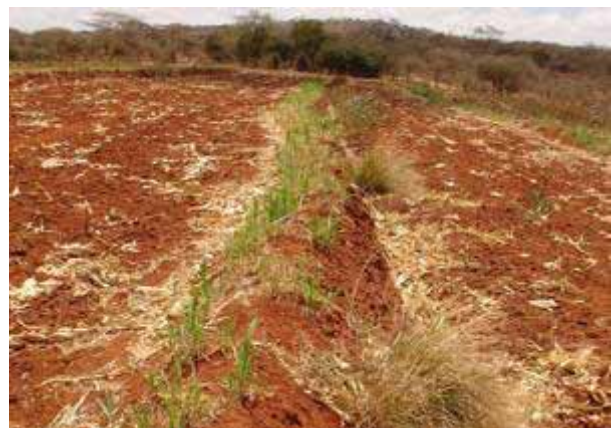

*Fanya juu bund in maize field after harvest: napier on upper part of bund and maize trash in ditch below. (Machakos, Kenya)*

## 2.2 Purpose and classification

### 2.2.1 Specify the major land use problems related to soil, water and vegetation in the area (without land conservation):

In your opinion: .....

.....

From the land users'\* point of view: .....

.....

*\*Land user (definition): the person / entity who implements / maintains land conservation, including individual small/large scale farmers, groups (gender, age, status, interest etc), cooperatives, industrial companies (eg mining), government institutions (eg state forest), etc*

### 2.2.2 Characterisation and purpose of the Technology

#### 2.2.2.1 On which current land use type is the Technology applied?

Land use type(s) - subcategory(ies): ..... (usually one type, maximum two)

**If land use has changed due to the implementation of the Technology, indicate land use type before and after:**

Original land use (before implementation of SLM Technology): .....

Future (final) land use (after implementation of SLM Technology)(if relevant): .....

*Use the land use types and subcategory(ies) listed below. Further details on land use (including irrigation, etc. will be dealt with in sections 2.8.8 (cropland and mixed land), 2.8.9 (grazing land), 2.8.10 (forest), 2.8.11 (other land).*

*Land use: human activities which are directly related to land, making use of its resources or having an impact upon it.*

*Land cover: Vegetation (natural or planted) or man-made structures (buildings, etc.) that cover the earth's surface.*

| Land use type                                                                                                    | Subcategory codes                                                                                                                                                                                                                                                                                                                                                                                                                                                                                                                                                                                                                                                                                                                 |
|------------------------------------------------------------------------------------------------------------------|-----------------------------------------------------------------------------------------------------------------------------------------------------------------------------------------------------------------------------------------------------------------------------------------------------------------------------------------------------------------------------------------------------------------------------------------------------------------------------------------------------------------------------------------------------------------------------------------------------------------------------------------------------------------------------------------------------------------------------------|
| <b>Cropland:</b> Land used for cultivation of crops (field crops, orchards).                                     | <ul style="list-style-type: none"> <li>• <b>Ca: Annual cropping:</b> land under temporary / annual crops usually harvested within one, maximally within two years (eg maize, paddy rice, wheat, vegetables, fodder crops)</li> <li>• <b>Cp: Perennial (non-woody) cropping:</b> land under permanent (not woody) crops that may be harvested after 2 or more years, or only part of the plants are harvested (eg sugar cane, banana, sisal, pineapple)</li> <li>• <b>Ct: Tree and shrub cropping:</b> permanent woody plants with crops harvested more than once after planting and usually lasting for more than 5 years (eg orchards / fruit trees, coffee, tea, grapevines, oil palm, cacao, coconut, fodder trees)</li> </ul> |
| <b>Grazing land:</b> Land used for animal production                                                             | <ul style="list-style-type: none"> <li>• <b>Ge: Extensive grazing land:</b> grazing on natural or semi-natural grasslands, grasslands with trees / shrubs (savannah vegetation) or open woodlands for livestock and wildlife</li> <li>• <b>Gi: Intensive grazing/ fodder production:</b> improved or planted pastures for grazing/ production of fodder (for cutting and carrying: hay, leguminous species, silage etc) not including fodder crops such as maize, cereals. These are classified as annual crops (see above)</li> </ul>                                                                                                                                                                                            |
| <b>Forests / woodlands:</b> land used mainly for wood production, other forest products, recreation, protection. | <ul style="list-style-type: none"> <li>• <b>Fn: Natural:</b> forests composed of indigenous trees, not planted by man</li> <li>• <b>Fp: Plantations, afforestations:</b> forest stands established by planting or/and seeding in the process of afforestation or reforestation</li> <li>• <b>Fo: Other:</b> eg selective cutting of natural forests and incorporating planted species</li> </ul>                                                                                                                                                                                                                                                                                                                                  |
| <b>Mixed:</b> mixture of land use types within the same land unit.                                               | <ul style="list-style-type: none"> <li>• <b>Mf: Agroforestry:</b> cropland and trees</li> <li>• <b>Mp: Agro-pastoralism:</b> cropland and grazing land (including seasonal change between crops and livestock)</li> <li>• <b>Ma: Agro-silvopastoralism:</b> cropland, grazing land and trees (including seasonal change between crops and livestock)</li> <li>• <b>Ms: Silvo-pastoralism:</b> forest and grazing land</li> <li>• <b>Mo: Other:</b> other mixed land</li> </ul>                                                                                                                                                                                                                                                    |
| <b>Other:</b>                                                                                                    | <ul style="list-style-type: none"> <li>• <b>Oi: Mines and extractive industries</b></li> <li>• <b>Os: Settlements, infrastructure networks:</b> roads, railways, pipe lines, power lines</li> <li>• <b>Ow: Waterways, drainage lines, ponds, dams</b></li> <li>• <b>Oo: Other:</b> wastelands, deserts, glaciers, swamps, recreation areas, etc</li> </ul>                                                                                                                                                                                                                                                                                                                                                                        |

**2.2.2.2 Which conservation measures does the Technology consist of?**

*Note: circles always require ranking; Important: check definitions below*

|                     |                       |                                             |
|---------------------|-----------------------|---------------------------------------------|
| agronomic measures  | <input type="radio"/> | Select category (ies) / code (s) from below |
| vegetative measures | <input type="radio"/> | .....                                       |
| structural measures | <input type="radio"/> | .....                                       |
| management measures | <input type="radio"/> | .....                                       |

**Land conservation measures – the constituents of a SLM Technology**

*Conservation measures fall into four categories: agronomic, vegetative, structural and management measures. Measures are components of SLM technologies. Each Technology is made up of one or – very commonly - a combination of measures: For instance, terraces – a typical structural measure – are often combined with other measures, such as grass on the risers for stabilisation and fodder (vegetative measure), or contour ploughing (agronomic measure). For detailed explanations refer to [www.wocat.net](http://www.wocat.net)*

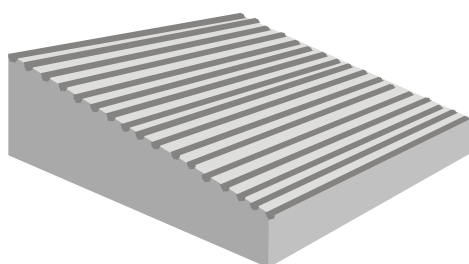

**Agronomic measures** such as conservation agriculture, manuring / composting, mixed cropping, contour cultivation, mulching, etc.

- are usually associated with annual crops
- are repeated routinely each season or in a rotational sequence
- are of short duration and not permanent
- do not lead to changes in slope profile
- are normally independent of slope

**A1:** Vegetation / soil cover

**A2:** Organic matter / soil fertility

**A3:** Soil surface treatment

**A4:** Subsurface treatment

**A5:** Others

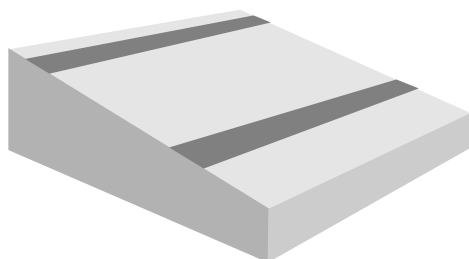

**Vegetative measures** such as grass strips, hedge barriers, windbreaks, agroforestry etc.

- involve the use of perennial grasses, shrubs or trees
- are of long duration
- often lead to a change in slope profile
- are often aligned along the contour or against the prevailing wind direction
- are often spaced according to slope

**V1:** Tree and shrub cover

**V2:** Grasses and perennial herbaceous plants

**V3:** Clearing of vegetation (eg fire breaks/reduced fuel)

**V4:** Others

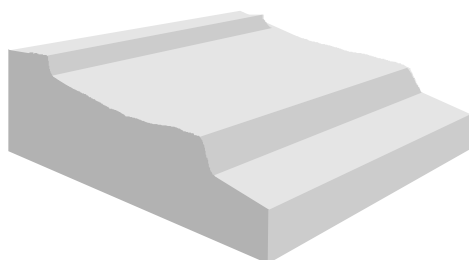

**Structural measures** such as terraces, banks, bunds, constructions, palisades, etc

- often lead to a change in slope profile
- are of long duration or permanent
- are carried out primarily to control runoff, wind velocity and erosion and to harvest rainwater
- often require substantial inputs of labour or money when first installed
- are often aligned along the contour / against prevailing wind direction
- are often spaced according to slope
- involve major earth movements and / or construction with wood, stone, concrete, etc.

**S1:** Bench terraces (slope of terrace bed <6%)

**S2:** Forward sloping terraces (slope of terrace bed >6%)

**S3:** Bunds / banks

**S4:** Graded ditches / waterways (to drain and convey water)

**S5:** Level ditches / pits

**S6:** Dams / pans: store excessive water

**S7:** Reshaping surface (reducing slope)

**S8:** Walls / barriers / palisades

**S9:** Others

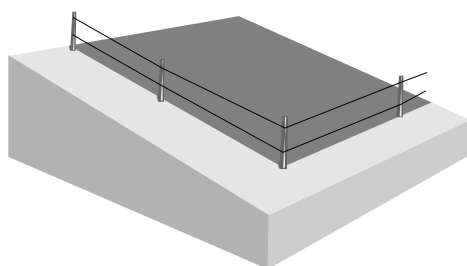

**Management measures** such as land use change, area closure, rotational grazing, etc.

- involve a fundamental change in land use
- involve no agronomic and structural measures
- often result in improved vegetative cover
- often reduce the intensity of use

- M1:** Change of land use type
- M2:** Change of management / intensity level
- M3:** Layout according to natural and human environment
- M4:** Major change in timing of activities
- M5:** Control / change of species composition (if annually or in a rotational sequence as done eg on cropland -> A1)
- M6:** Waste Management: includes recycling, re-use or reduce: includes both artificial and natural methods for waste management
- M7:** Others

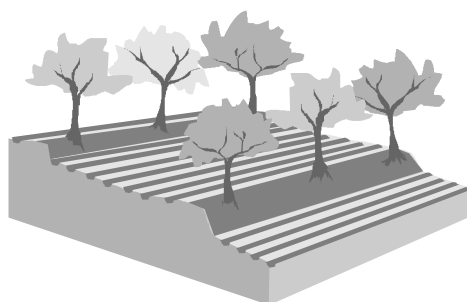

**Combinations** in conditions where different measures are complementary and thus enhance each other's effectiveness.

Any combinations of the above measures are possible, eg:

- **structural:** terrace with
- **vegetative:** grass and trees with
- **agronomic:** ridges

Example: **S1,V1, V2, A3:**

**2.2.2.3 Which of the following goals does the Technology pursue (stage of intervention)?**

- prevention\* of land degradation
- mitigation / reduction of land degradation
- rehabilitation / reclamation of denuded land

\* Good land management practices already in place on land that may be prone to land degradation. In this case list the common degradation that occurs in the area without the Technology in 2.2.2.4.

**Circles always require ranking!** It is possible to give more than one option the same rank, but not necessarily all circles need to be given a number. Use only ranks 1, 2 or 3!

1 = very important / large extent  
 2 = important / medium extent  
 3 = less important / little extent

**2.2.2.4 Which types of land degradation are mainly addressed by the Technology?**

- Select the types / codes from the list below
- .....
  - .....
  - .....
  - .....

**Degradation types (for detailed explanations refer to [www.wocat.net](http://www.wocat.net)):**

- W: Soil erosion by water**
- Wt** loss of topsoil / surface erosion: even removal of top soil, sheet and interrill erosion
  - Wg** gully erosion / gullying
  - Wm** mass movements / landslides
  - Wr** riverbank erosion
  - Wc** coastal erosion
  - Wo** offsite degradation effects: deposition of sediments, downstream flooding, siltation of reservoirs and waterways, and pollution of water bodies with eroded sediments

**E: Soil erosion by wind**

- Et* loss of topsoil: uniform displacement
- Ed* deflation and deposition: uneven removal of soil material
- Eo* offsite degradation effects: covering of the terrain with windborne sand particles from distant sources ("overblowing")

**C: Chemical soil deterioration**

- Cn* fertility decline and reduced organic matter content (not caused by erosion): eg leaching, soil fertility mining, nutrient oxidation and volatisation (N)
- Ca* acidification: lowering of the soil pH
- Cp* soil pollution: contamination of the soil with toxic materials
- Cs* salinisation / alkalinisation: a net increase of the salt content of the (top) soil leading to a productivity decline

**P: Physical soil deterioration**

- Pc* compaction: deterioration of soil structure by trampling or the weight and/or frequent use of machinery
- Pk* sealing and crusting: clogging of pores with fine soil material and development of a thin impervious layer at the soil surface obstructing the infiltration of rainwater
- Pw* waterlogging: effects of human induced water saturation of soils (excluding paddy fields)
- Ps* subsidence of organic soils, settling of soil
- Pu* loss of bio-productive function due to other activities (eg construction, mining, roads, etc)

**B: Biological degradation**

- Bc* reduction of vegetation cover: increase of bare / unprotected soil
- Bh* loss of habitats: decreasing vegetation diversity (fallow land, mixed systems, field borders), increased fragmentation of habitats
- Bq* quantity / biomass decline: reduced vegetative production for different land use
- Bf* detrimental effects of fires (includes low / high severity of fires): on forest (eg slash and burn), bush, grazing and cropland (burning of residues)
- Bs* quality and species composition /diversity decline: loss of natural species, land races, palatable perennial grasses; spreading of invasive, salt-tolerant, unpalatable, species / weeds
- Bl* loss of soil life: decline of soil macro-organisms and micro-organisms in quantity and quality
- Bp* increase of pests / diseases, loss of predators: reduction of biological control

**H: Water degradation**

- Ha* aridification: decrease of average soil moisture content
- Hs* change in quantity of surface water: change of the flow regime (flood, /peak flow, low flow, drying up of rivers and lakes)
- Hg* change in groundwater / aquifer level: lowering of groundwater table due to over-exploitation or reduced recharge of groundwater; or increase of groundwater table resulting in waterlogging and/or salinisation
- Hp* decline of surface water quality: increased sediments and pollutants in fresh water bodies due to point pollution and land-based pollution
- Hq* decline of groundwater quality: due to pollutants infiltrating into the aquifers
- Hw* reduction of the buffering capacity of wetland areas: to cope with flooding and pollution

**2.2.2.5 What were the main causes of land degradation (identified in 2.2.2.4)?**

**a) Direct causes**

Specify

**Human induced:**

- soil management  .....
- crop management (annual, perennial, tree/shrub)  .....
- deforestation / removal of natural vegetation (incl. forest fires)  .....
- over-exploitation of vegetation for domestic use  .....
- overgrazing  .....
- industrial activities and mining  .....
- urbanisation and infrastructure development  .....
- discharges (point contamination of water)  .....
- release of airborne pollutants (urban/industry...)  .....
- disturbance of water cycle (infiltration / runoff)  .....
- over abstraction / excessive withdrawal of water (for irrigation, industry, etc.)  .....
- other human induced causes (specify)  .....



**Natural:**

- change in temperature  .....
- change of seasonal rainfall  .....
- Heavy / extreme rainfall (intensity/amounts)  .....
- wind storms / dust storms  .....
- floods  .....
- droughts  .....
- other natural causes (avalanches, volcanic eruptions, mud flows, highly susceptible natural resources, extreme topography, etc.) specify  .....

**b) Indirect causes**

Specify

- population pressure  .....
- land tenure  .....
- poverty / wealth  .....
- labour availability  .....
- inputs and infrastructure: (roads, markets, distribution of water points, other, ...  .....
- education, access to knowledge and support services  .....
- war and conflicts  .....
- governance / institutional  .....
- other (specify) .....  .....
- other (specify) .....  .....

**Causes of degradation**

Various types of human activities and natural causes may lead to soil degradation. The emphasis in the degradation inventory is on human-induced degradation, but sometimes natural degradation also necessitates measures to be taken (for definitions refer to Annex 4 / [www.wocat.net](http://www.wocat.net)).

**2.2.2.6 How does the Technology combat land degradation (technical functions)?**

- control of raindrop splash
- control of dispersed runoff:
  - retain / trap
  - impede / retard
- control of concentrated runoff:
  - retain / trap
  - impede / retard
  - drain / divert
- reduction of slope angle
- reduction of slope length
- improvement of ground cover
- increase of surface roughness
- improvement of surface structure (crusting, sealing)
- improvement of topsoil structure (compaction)
- improvement of subsoil structure (hardpan)
- stabilisation of soil (eg by tree roots against land slides)
- increase in organic matter
- increase in nutrient availability (supply, recycling,...)
- increase of infiltration
- increase / maintain water stored in soil
- increase of groundwater level, recharge of groundwater
- water harvesting / increase water supply

|                                                                                 |                       |
|---------------------------------------------------------------------------------|-----------------------|
| water spreading                                                                 | <input type="radio"/> |
| improvement of water quality, buffering/filtering water                         | <input type="radio"/> |
| sediment retention / trapping, sediment harvesting                              | <input type="radio"/> |
| reduction in wind speed                                                         | <input type="radio"/> |
| increase of biomass (quantity)                                                  | <input type="radio"/> |
| promotion of vegetation species and varieties<br>(quality, eg palatable fodder) | <input type="radio"/> |
| control of fires                                                                | <input type="radio"/> |
| reduction of dry material (fuel for wildfires)                                  | <input type="radio"/> |
| spatial arrangement and diversification of land use                             | <input type="radio"/> |
| others (specify) .....                                                          | <input type="radio"/> |
| .....                                                                           | <input type="radio"/> |

### 2.3 Status

#### 2.3.1 How has the Technology been developed (its origin)?

|                                                          |                                         |                                       |                          |                                  |
|----------------------------------------------------------|-----------------------------------------|---------------------------------------|--------------------------|----------------------------------|
|                                                          | <i>several answers possible</i>         |                                       |                          |                                  |
|                                                          | <i>rank according<br/>to importance</i> | <i>traditional<br/>(&gt;50 years)</i> | <i>10-50<br/>years</i>   | <i>recent<br/>(&lt;10 years)</i> |
| through land user's initiative (innovation, traditional) | <input type="radio"/>                   | <input type="checkbox"/>              | <input type="checkbox"/> | <input type="checkbox"/>         |
| through experiments / research                           | <input type="radio"/>                   | <input type="checkbox"/>              | <input type="checkbox"/> | <input type="checkbox"/>         |
| externally / introduced through project                  | <input type="radio"/>                   | <input type="checkbox"/>              | <input type="checkbox"/> | <input type="checkbox"/>         |
| other (specify): .....                                   | <input type="radio"/>                   | <input type="checkbox"/>              | <input type="checkbox"/> | <input type="checkbox"/>         |

Comments (eg precise years) .....

.....

*The terms **traditional / indigenous / existing / local** refer to the farmer's own practices. They cover practices in use ever since as well as the ones developed more recently by innovative farmers in response to changing circumstances. Use 'other' when the Technology does not fit any of the given categories and specify which and why it does not fit.*

#### 2.3.2 What level of technical knowledge is required for the implementation of the Technology?

|                                    |                          |                          |                          |                  |
|------------------------------------|--------------------------|--------------------------|--------------------------|------------------|
|                                    | low                      | moderate                 | high                     | Remarks/comments |
| field staff / agricultural advisor | <input type="checkbox"/> | <input type="checkbox"/> | <input type="checkbox"/> | .....            |
| land user                          | <input type="checkbox"/> | <input type="checkbox"/> | <input type="checkbox"/> | .....            |
| other specify: .....               | <input type="checkbox"/> | <input type="checkbox"/> | <input type="checkbox"/> | .....            |

## 2.4 Technical drawing

*Please provide a comprehensive and detailed drawing (with dimensions) of the SLM Technology and indicate technical specifications, measurements, spacing, gradient, etc., in the box below. It has to match the description given in 2.1.2 and complements the photograph in 2.1.3. Keep the drawing simple and schematic. The technical drawing is crucial for the understanding of the Technology! If the box is not sufficient, use the extra pages at the end of the questionnaire.*

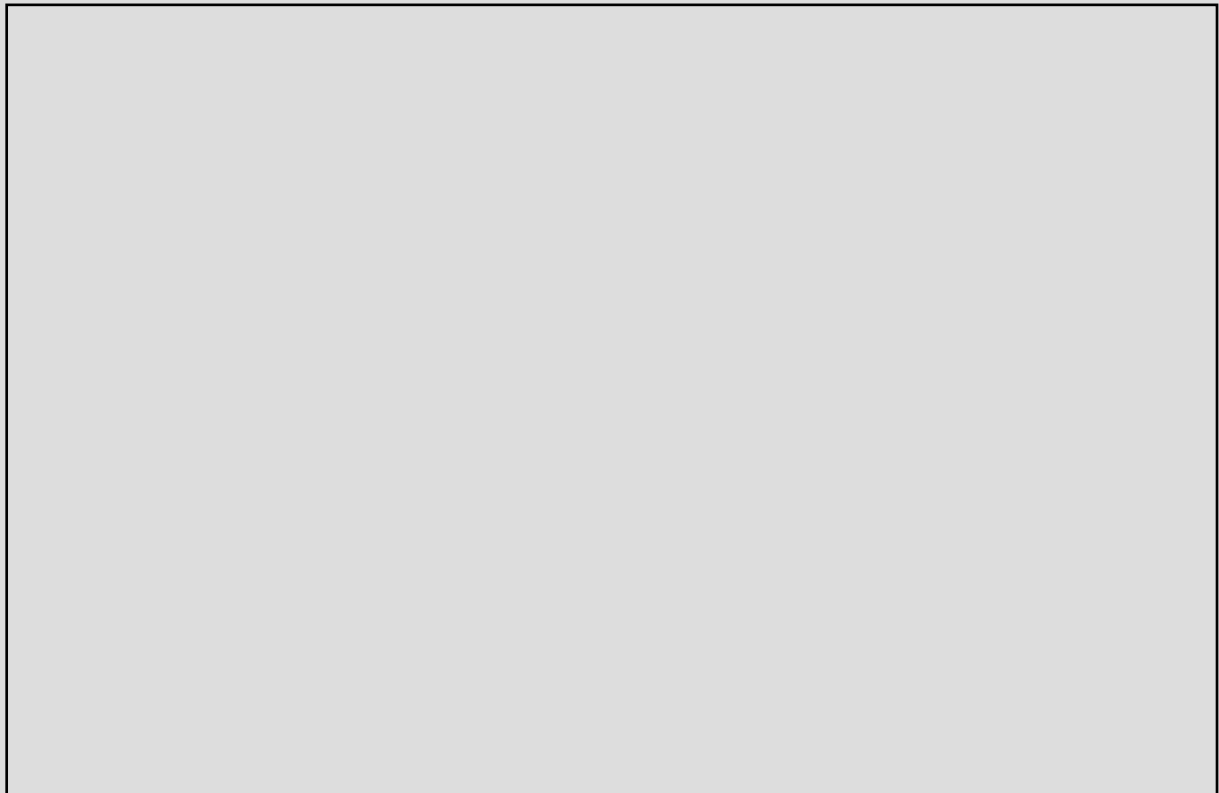

**Explanation of drawing:**

Description: .....

.....

.....

Location: ..... Distr./Prov./State: ..... Date: .....

Author: ..... Address: .....

.....

.....

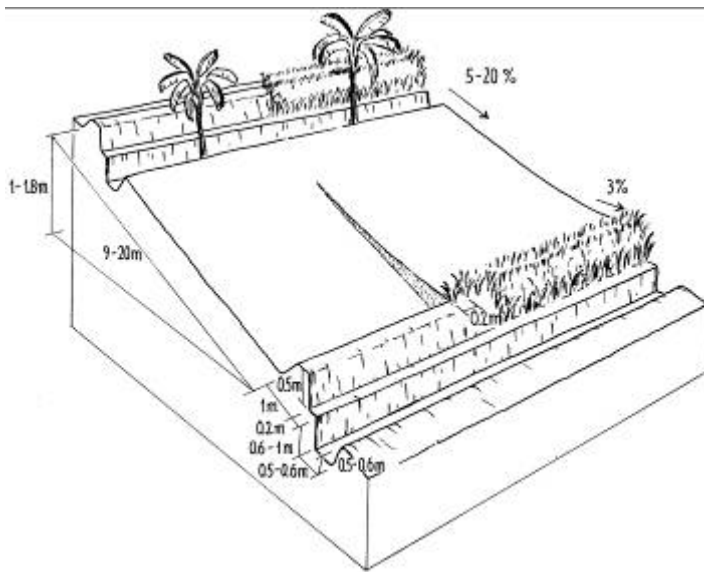

**Example:** Technical drawing indicating technical specifications, dimensions, spacing

## 2.5 Technical specifications, implementation activities, inputs and costs

*Notes to implementation activities, inputs and costs*

- A distinction is made between initial establishment (construction, initiation) and maintenance / recurrent annual activities.
- List activities and inputs and calculate costs for a typical (most common) situation within your conservation area. Indicate what inputs would cost today.
- Indicate all conservation-related activities, inputs and costs (to land users, projects, etc.) of the Technology that are additional to ordinary field operations
- In case the ordinary field operations have changed / are part of the Technology (eg conservation agriculture) describe all activities.
- In case the objective is to compare two situations ie after / with SLM measures (eg conservation agriculture) and before / without SLM measures (eg conventional agriculture) fill in two questionnaires (refer to page iii)
- Exclude costs for awareness creation, planning, training, research, and financial / material support (these will be addressed in Approach questionnaire 2.3.2.2)
- Activities, inputs and costs preferably should be indicated per area (per hectare) to guarantee comparability between different technologies. Include not only the area which is directly covered by conservation measures (eg the area that is covered with stone walls, tree lines, ditches) but also for the area that is indirectly affected / protected by the conservation measures.
- Where necessary, inputs and costs can alternatively be calculated per unit (other than ha) such as per entity (eg dam) or per length (eg meter grass strip, meter, tone, line)
- Give US dollar equivalent costs against current exchange rate where possible.
- It may be very difficult to determine the costs of a conservation technology. Nevertheless, we ask you to give the best estimate you can!

*If you have indicated only one category in question 2.2.2.2 (on land conservation measures), answer the questions in one of the following sections which corresponds to that category. If you have indicated more than one category in question 2.2.2.2, fill out each corresponding section.*

**2.5.1 Specifications of agronomic conservation measures**

*If in question 2.2.2.2 you have indicated that the SLM Technology consists of an agronomic measure, fill out the following section, otherwise go to 2.5.2.*

**2.5.1.1 Type and layout of agronomic measures**

*Refer to your drawings in question 2.4. See example below.*

| <i>Several answers possible</i>         | material / species       | quantity / density * | remarks (eg alignment / layout) |
|-----------------------------------------|--------------------------|----------------------|---------------------------------|
| <b>Vegetation / soil cover:</b>         |                          |                      |                                 |
| better crop cover                       | <input type="checkbox"/> | .....                | .....                           |
| early planting                          | <input type="checkbox"/> | .....                | .....                           |
| relay cropping                          | <input type="checkbox"/> | .....                | .....                           |
| mixed cropping / intercropping          | <input type="checkbox"/> | .....                | .....                           |
| contour planting / strip cropping       | <input type="checkbox"/> | .....                | .....                           |
| cover cropping                          | <input type="checkbox"/> | .....                | .....                           |
| retaining more vegetation cover         | <input type="checkbox"/> | .....                | .....                           |
| mulching                                | <input type="checkbox"/> | .....                | .....                           |
| temporary trashlines                    | <input type="checkbox"/> | .....                | .....                           |
| other (specify) .....                   | <input type="checkbox"/> | .....                | .....                           |
| <b>Organic matter / soil fertility:</b> |                          |                      |                                 |
| green manure                            | <input type="checkbox"/> | .....                | .....                           |
| legume inter-planting                   | <input type="checkbox"/> | .....                | .....                           |
| manure / compost / residues             | <input type="checkbox"/> | .....                | .....                           |
| mineral (inorganic) fertilizers         | <input type="checkbox"/> | .....                | .....                           |
| soil conditioners (lime, gypsum)        | <input type="checkbox"/> | .....                | .....                           |
| rotations / fallows                     | <input type="checkbox"/> | .....                | .....                           |
| other (specify) .....                   | <input type="checkbox"/> | .....                | .....                           |
| <b>Soil surface / subsurface:</b>       |                          |                      |                                 |
| breaking crust / sealed surface         | <input type="checkbox"/> | .....                | .....                           |
| breaking compacted topsoil              | <input type="checkbox"/> | .....                | .....                           |
| zero tillage / no-till                  | <input type="checkbox"/> | .....                | .....                           |
| minimum tillage                         | <input type="checkbox"/> | .....                | .....                           |
| non-inversion tillage                   | <input type="checkbox"/> | .....                | .....                           |
| contour tillage                         | <input type="checkbox"/> | .....                | .....                           |
| contour ridging                         | <input type="checkbox"/> | .....                | .....                           |
| furrows (drainage, irrigation)          | <input type="checkbox"/> | .....                | .....                           |
| pits                                    | <input type="checkbox"/> | .....                | .....                           |
| breaking compacted subsoil              | <input type="checkbox"/> | .....                | .....                           |
| deep tillage / double digging           | <input type="checkbox"/> | .....                | .....                           |
| other (specify) .....                   | <input type="checkbox"/> | .....                | .....                           |

\* quantity / density: t/ha or plants per ha

**Types of agronomic land conservation measures (for more definitions refer to [www.wocat.net](http://www.wocat.net)):**

**Better crop cover:** selecting crops with higher ground cover, increasing plant density, etc.

**Relay cropping:** specific form of mixed cropping / intercropping in which a second crop is planted into an established stand of a main crop. The second crop develops fully after the main crop is harvested.

**Cover cropping:** planting close-growing crops (usually annual legumes), mainly to protect the soil, between perennials or in the period between seasons for annual crops.

**Removing less vegetation cover:** eg cutting less grass, leaving a volunteer crop.

**Trashlines:** line of crop residues / weeds laid out along the contour to act as a barrier to runoff and erosion. May be allowed to rot and dug into the ground to improve fertility (in this case, it is used as a ‘mobile compost strip’), or can provide the basis for a permanent structure.

**Mulching:** spreading of organic (or other) materials on the surface of the soil around crops to reduce moisture loss, reduce erosion, inhibit weed growth, etc.:

**Green manure:** a crop grown to be ploughed / incorporated into the ground to increase organic matter content, thereby improving fertility and reducing erodibility.

**Rotations:** the practice of alternating the annual crops grown on a specific field in a planned pattern or sequence in successive crop years so that crops of the same species or family are not grown repeatedly without interruption on the same field, practiced to replenish soil, and curb pests and diseases.

**Zero tillage/no-till:** a system where crops are planted into the soil without primary tillage.

**Breaking compacted subsoil (hard pans):** eg deep ripping, subsoiling. Deep ripping of soil with a tine or similar tool, normally to break a hard pan and / or to improve drainage and infiltration.

**Double digging:** hand digging the soil up to twice as deep as normally in order to improve drainage, infiltration and rooting characteristics.

**2.5.1.2 Activities, inputs and costs for agronomic measures**

see explanations under 2.5

**Initial investment**

| Input | Quantity | Total costs local currency | Total costs US\$ | % borne by land user | No. of parties (sharing) | life-span of product (eg 2 years) |
|-------|----------|----------------------------|------------------|----------------------|--------------------------|-----------------------------------|
|       |          |                            |                  |                      |                          |                                   |
|       |          |                            |                  |                      |                          |                                   |
|       |          |                            |                  |                      |                          |                                   |
|       |          |                            |                  |                      |                          |                                   |
|       |          |                            |                  |                      |                          |                                   |
|       |          |                            |                  |                      |                          |                                   |

Agronomic measures are per definition recurrent activities which are repeated each season. However, some of them require an initial investment, eg. for special machinery.

**Maintenance / recurrent activities**

| Activity | Timing/frequency* | Input select from list below | Quantity (person days, no., kg, l, etc) | Unit** (ha, m, dam) | Total costs local currency | Total costs US\$ | % borne by land user |
|----------|-------------------|------------------------------|-----------------------------------------|---------------------|----------------------------|------------------|----------------------|
| 1.       |                   |                              |                                         |                     |                            |                  |                      |
|          |                   |                              |                                         |                     |                            |                  |                      |
|          |                   |                              |                                         |                     |                            |                  |                      |
|          |                   |                              |                                         |                     |                            |                  |                      |
| 2.       |                   |                              |                                         |                     |                            |                  |                      |
|          |                   |                              |                                         |                     |                            |                  |                      |
|          |                   |                              |                                         |                     |                            |                  |                      |
|          |                   |                              |                                         |                     |                            |                  |                      |
| 3.       |                   |                              |                                         |                     |                            |                  |                      |
|          |                   |                              |                                         |                     |                            |                  |                      |
|          |                   |                              |                                         |                     |                            |                  |                      |
|          |                   |                              |                                         |                     |                            |                  |                      |

| Activity | Timing/<br>frequency<br>* | Input<br><i>select from list<br/>below</i> | Quantity<br>(person days,<br>no., kg, l, etc) | Unit**<br>(ha, m,<br>dam) | Total costs<br>local<br>currency | Total<br>costs<br>US\$ | % borne<br>by land<br>user |
|----------|---------------------------|--------------------------------------------|-----------------------------------------------|---------------------------|----------------------------------|------------------------|----------------------------|
| 4.       |                           |                                            |                                               |                           |                                  |                        |                            |
|          |                           |                                            |                                               |                           |                                  |                        |                            |
|          |                           |                                            |                                               |                           |                                  |                        |                            |
|          |                           |                                            |                                               |                           |                                  |                        |                            |
| 5.       |                           |                                            |                                               |                           |                                  |                        |                            |
|          |                           |                                            |                                               |                           |                                  |                        |                            |
|          |                           |                                            |                                               |                           |                                  |                        |                            |
|          |                           |                                            |                                               |                           |                                  |                        |                            |

\* **Timing:** time, at which activity is carried out, eg after harvest of crops, before onset of rains, etc.

**Frequency:** eg annually, each cropping season, etc.

\*\* **Unit:** preferably hectares (ha) and if not possible, entity (dam) or length (eg. meter of stone line)

### Input:

#### Labour<sup>1</sup>

- labour light (person days)
- labour medium (person days)
- labour heavy (person days)

#### Equipment

- machine hours<sup>2</sup> (h)
- animal traction (h)
- tools
- other (specify)

#### Construction Material

- stone (m<sup>3</sup>)
- wood (m<sup>3</sup>)
- earth (m<sup>3</sup>)
- other (specify)

#### Agricultural

- seeds (kg)
- seedlings (No.)
- fertilizer (kg)
- biocides (kg or l active ingredient)
- compost / manure (kg)
- other (specify)

<sup>1</sup> The labour cost should be based on the total person days, be they paid or voluntary and the strenuousness (light, medium, heavy) of the work done. To calculate the US \$ equivalent first indicate daily wage and then multiply the daily wage with the number of person days.

<sup>2</sup> Machine hours: calculation should be based on hiring costs; -- include costs of operation and depreciation

Specify machinery / tools: .....

Provide **further relevant information** on the agronomic measures in Annex 3

### Example: Activities, inputs and costs for agronomic measures

#### Maintenance / recurrent activities

| Activity                                                           | Timing/<br>frequency | Input<br><i>select from list<br/>below</i> | Quantity<br>(person days,<br>no., kg, l, etc) | Unit (ha,<br>m, dam) | Total costs<br>local<br>currency | Total<br>costs US\$ | % borne<br>by land<br>user |
|--------------------------------------------------------------------|----------------------|--------------------------------------------|-----------------------------------------------|----------------------|----------------------------------|---------------------|----------------------------|
| 1. Direct seeding/fertilizer (NPK) banding using no-till drill     | Early Nov.           | labour light                               | 8 person days                                 | ha                   |                                  | 80                  | 100                        |
|                                                                    |                      | machine                                    | 6 h                                           | ha                   |                                  | 60                  | 0                          |
|                                                                    |                      | fertilizer                                 | 130 kg                                        | ha                   |                                  | 30                  | 0                          |
| 2. Leave fields to fallow for 18 months, apply herbicide if needed | After harvest        | labour light                               | 1 person day                                  | ha                   |                                  | 10                  |                            |
|                                                                    |                      | machine                                    | 1 h                                           | ha                   |                                  | 10                  |                            |
|                                                                    |                      | herbicide                                  | 4 l                                           | ha                   |                                  | 40                  | 0                          |

**2.5.2 Specifications of vegetative conservation measures**

If in question 2.2.2.2 you have indicated that the SLM Technology consists of a vegetative measure, fill out the following section, otherwise go to 2.5.3. Refer to your drawings in question 2.4. See example below. See explanations under 2.5

**2.5.2.1 Type and alignment / layout of vegetative measures**

Several answers possible

| vegetative measures :         | vegetative material * <sup>1</sup> | Number of plants per (ha) | between rows / strips / blocks* <sup>2</sup> |             | within rows / strips / blocks (between plants) |           |
|-------------------------------|------------------------------------|---------------------------|----------------------------------------------|-------------|------------------------------------------------|-----------|
|                               |                                    |                           | vertical interval (m)                        | spacing (m) | interval (m)                                   | width (m) |
| aligned : -contour            | <input type="checkbox"/>           | .....                     | .....                                        | .....       | .....                                          | .....     |
| -graded strips * <sup>3</sup> | <input type="checkbox"/>           | .....                     | .....                                        | .....       | .....                                          | .....     |
| -against wind                 | <input type="checkbox"/>           | .....                     | .....                                        | .....       | .....                                          | .....     |
| -along boundary               | <input type="checkbox"/>           | .....                     | .....                                        | .....       | .....                                          | .....     |
| -linear                       | <input type="checkbox"/>           | .....                     | .....                                        | .....       | .....                                          | .....     |
| scattered / dispersed         | <input type="checkbox"/>           | .....                     | .....                                        | .....       | .....                                          | .....     |
| in blocks                     | <input type="checkbox"/>           | .....                     | .....                                        | .....       | .....                                          | .....     |
| others (specify)              |                                    |                           |                                              |             |                                                |           |
| .....                         | <input type="checkbox"/>           | .....                     | .....                                        | .....       | .....                                          | .....     |
| .....                         | <input type="checkbox"/>           | .....                     | .....                                        | .....       | .....                                          | .....     |
| .....                         | <input type="checkbox"/>           | .....                     | .....                                        | .....       | .....                                          | .....     |

\*<sup>1</sup> vegetative material:  
 Combinations possible Specify species and if planted/seeded or naturally reg.:

T : trees / shrubs (eg acacia, perennial fodder and browse spp.) .....

F : fruit trees / shrubs (eg mango, apple, berries, grapes) .....

C : perennial crops (eg coffee, tea, alfalfa) .....

G : grass .....

O : other .....

\*<sup>2</sup> Indicate slope (which determines the spacing indicated above) : ..... %  
 (add more details on slope / spacing in Annex 3)  
 If the original slope has changed as a result of the Technology, the slope today is (see figure below):.....

%  
 \*<sup>3</sup> Indicate the gradient along the rows / strips ..... %



**Specifications:**

**Cross-section:**

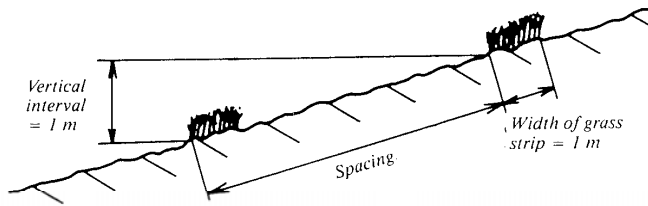

**View from top:**

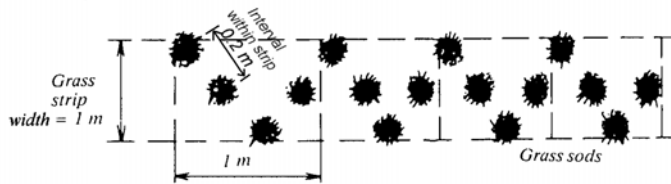

- Grass strips are planted along the contour or along a cut-off drain.
- Spacing with a vertical interval of 1 meter means that on a 3 % slope, grass strips will be 33 m apart, and on a 15 % slope, only 7 m apart, which is, however, still sufficient for ploughing between the strips.

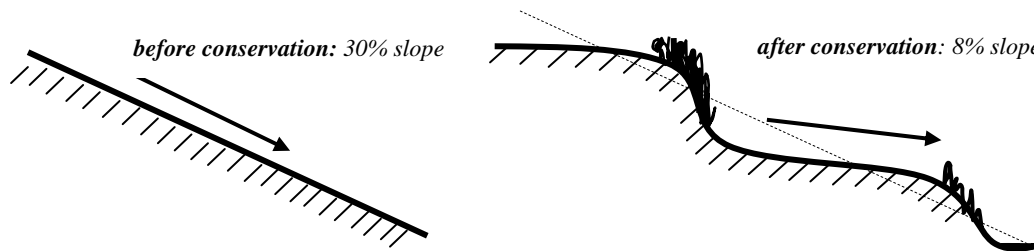

**2.5.2.2 Activities, inputs and costs for vegetative measures**

**Initial establishment**

| Activity | Timing | Input<br><i>select from list below</i> | Quantity<br>(person days, no., kg, l, etc) | Unit*<br>(ha, m, dam) | Total costs<br>local currency | Total costs<br>US\$ | % borne<br>by land user |
|----------|--------|----------------------------------------|--------------------------------------------|-----------------------|-------------------------------|---------------------|-------------------------|
| 1.       |        |                                        |                                            |                       |                               |                     |                         |
| 2.       |        |                                        |                                            |                       |                               |                     |                         |
| 3.       |        |                                        |                                            |                       |                               |                     |                         |
| 4.       |        |                                        |                                            |                       |                               |                     |                         |
| 5.       |        |                                        |                                            |                       |                               |                     |                         |

\* **Unit:** preferably hectares (ha) and if not possible, entity (dam) or length (eg meter of stone line)

**Maintenance / recurrent activities**

| Activity | Timing/<br>frequency<br>* | Input<br><i>select from list<br/>below</i> | Quantity<br>(person days,<br>no., kg, l, etc) | Unit**<br>(ha, m,<br>dam) | Total costs<br>local<br>currency | Total costs<br>US\$ | % borne<br>by land<br>user |
|----------|---------------------------|--------------------------------------------|-----------------------------------------------|---------------------------|----------------------------------|---------------------|----------------------------|
| 1.       |                           |                                            |                                               |                           |                                  |                     |                            |
|          |                           |                                            |                                               |                           |                                  |                     |                            |
|          |                           |                                            |                                               |                           |                                  |                     |                            |
|          |                           |                                            |                                               |                           |                                  |                     |                            |
| 2.       |                           |                                            |                                               |                           |                                  |                     |                            |
|          |                           |                                            |                                               |                           |                                  |                     |                            |
|          |                           |                                            |                                               |                           |                                  |                     |                            |
|          |                           |                                            |                                               |                           |                                  |                     |                            |
| 3.       |                           |                                            |                                               |                           |                                  |                     |                            |
|          |                           |                                            |                                               |                           |                                  |                     |                            |
|          |                           |                                            |                                               |                           |                                  |                     |                            |
|          |                           |                                            |                                               |                           |                                  |                     |                            |
| 4.       |                           |                                            |                                               |                           |                                  |                     |                            |
|          |                           |                                            |                                               |                           |                                  |                     |                            |
|          |                           |                                            |                                               |                           |                                  |                     |                            |
|          |                           |                                            |                                               |                           |                                  |                     |                            |
| 5.       |                           |                                            |                                               |                           |                                  |                     |                            |
|          |                           |                                            |                                               |                           |                                  |                     |                            |
|          |                           |                                            |                                               |                           |                                  |                     |                            |
|          |                           |                                            |                                               |                           |                                  |                     |                            |

\* **Timing:** time, at which activity is carried out, eg after harvest of crops, before onset of rains, etc.

**Frequency:** eg annually, each cropping season, etc.

\*\***Unit:** preferably hectares (ha) and if not possible, entity (dam) or length (eg meter of stone line)

**Inputs:**

| <i>Labour<sup>1</sup></i>     | <i>Equipment</i>                 | <i>Construction material</i> | <i>Agricultural</i>                     |
|-------------------------------|----------------------------------|------------------------------|-----------------------------------------|
| - labour light (person days)  | - machine hours <sup>2</sup> (h) | - stone (m3)                 | - seeds (kg)                            |
| - labour medium (person days) | - animal traction (h)            | - wood (m3)                  | - seedlings (No.)                       |
| - labour heavy (person days)  | - tools                          | - earth (m3)                 | - fertilizer (kg)                       |
|                               | - other (specify)                | - other (specify)            | - biocides (kg or l active ingredient)) |
|                               |                                  |                              | - compost / manure (kg)                 |
|                               |                                  |                              | - other (specify)                       |

<sup>1</sup> The labour cost should be based on the total person days, be they paid or voluntary and the strenuousness (light, medium, heavy) of the work done. To calculate the US \$ equivalent first indicate daily wage and then multiply the daily wage with the number of person days.

<sup>2</sup> Machine hours: calculation should be based on hiring costs; -- include costs of operation and depreciation

Specify machinery / tools: .....

Provide **further relevant information** on the vegetative measures in Annex 3.

If vegetative measures are used to stabilise structures also fill out structural measures 2.5.3

**Example: Activities, inputs and costs for vegetative measures**

**Initial establishment**

| Activity                                                                                                       | Timing            | Input<br><i>select from list below</i> | Quantity<br>(person days, no., kg, l, etc) | Unit (ha, m, dam) | Total costs<br>local<br>currency | Total costs<br>US\$ | % borne<br>by land<br>user |
|----------------------------------------------------------------------------------------------------------------|-------------------|----------------------------------------|--------------------------------------------|-------------------|----------------------------------|---------------------|----------------------------|
| 1. Layout of contours with the use of an A-frame before land preparation, place wooden pegs along the contours | during dry season | labour light                           | 1 person day                               | ha                |                                  | 3                   | 100                        |
|                                                                                                                |                   | pegs                                   | 100                                        | ha                |                                  | 4                   | 100                        |
|                                                                                                                |                   |                                        |                                            |                   |                                  |                     |                            |
| 2. Initial ploughing along the contour: leaving unploughed strips                                              |                   | labour medium                          | 4 person days                              | ha                |                                  | 12                  | 100                        |
|                                                                                                                |                   | animal traction                        | 32 h                                       | ha                |                                  | 40                  | 100                        |
|                                                                                                                |                   | tools                                  |                                            | ha                |                                  | 25                  | 100                        |

**2.5.3 Specifications of structural conservation measures**

If in question 2.2.2.2 you have indicated that the SLM Technology consists of a structural measure, fill out the following section, otherwise go to 2.5.4. Refer to your drawings in question 2.4. See example below.

**2.5.3.1 Type and alignment / layout of structures**

Several answers possible

| structures                                                                          | material<br>*1<br>E, S, W,<br>C, O | between structures<br>*2    |                | dimensions of each structure |              |               |                          |              |               |
|-------------------------------------------------------------------------------------|------------------------------------|-----------------------------|----------------|------------------------------|--------------|---------------|--------------------------|--------------|---------------|
|                                                                                     |                                    | vertical<br>interval<br>(m) | spacing<br>(m) | ditches / pits / dams        |              |               | bunds / banks / others*3 |              |               |
|                                                                                     |                                    |                             |                | depth<br>(m)                 | width<br>(m) | length<br>(m) | height<br>(m)            | width<br>(m) | length<br>(m) |
| diversion ditch/ drainage <input type="checkbox"/>                                  | .....                              | .....                       | .....          | .....                        | .....        | .....         | .....                    | .....        | .....         |
| waterway <input type="checkbox"/>                                                   | .....                              | .....                       | .....          | .....                        | .....        | .....         | .....                    | .....        | .....         |
| spillway <input type="checkbox"/>                                                   | .....                              | .....                       | .....          | .....                        | .....        | .....         | .....                    | .....        | .....         |
| dam/ pan/ pond*5 <input type="checkbox"/>                                           | .....                              | .....                       | .....          | .....                        | .....        | .....         | .....                    | .....        | .....         |
| wall/ barrier *3 <input type="checkbox"/>                                           | .....                              | .....                       | .....          | .....                        | .....        | .....         | .....                    | .....        | .....         |
| retention/ infiltration ditch/ pit,<br>sediment/ sand trap <input type="checkbox"/> | .....                              | .....                       | .....          | .....                        | .....        | .....         | .....                    | .....        | .....         |
| terrace: forward sloping*2/4 <input type="checkbox"/>                               | .....                              | .....                       | .....          | .....                        | .....        | .....         | .....                    | .....        | .....         |
| bench level *4 <input type="checkbox"/>                                             | .....                              | .....                       | .....          | .....                        | .....        | .....         | .....                    | .....        | .....         |
| backward sloping*2/4 <input type="checkbox"/>                                       | .....                              | .....                       | .....          | .....                        | .....        | .....         | .....                    | .....        | .....         |
| bund/ bank: level <input type="checkbox"/>                                          | .....                              | .....                       | .....          | .....                        | .....        | .....         | .....                    | .....        | .....         |
| graded *4 <input type="checkbox"/>                                                  | .....                              | .....                       | .....          | .....                        | .....        | .....         | .....                    | .....        | .....         |
| semi-circular /<br>V shaped                                                         |                                    |                             |                |                              |              |               |                          |              |               |
| trapezoidal <input type="checkbox"/>                                                | .....                              | .....                       | .....          | .....                        | .....        | .....         | .....                    | .....        | .....         |
| reshaping surface <input type="checkbox"/>                                          | .....                              | .....                       | .....          | .....                        | .....        | .....         | .....                    | .....        | .....         |
| other: ..... <input type="checkbox"/>                                               | .....                              | .....                       | .....          | .....                        | .....        | .....         | .....                    | .....        | .....         |
| other: ..... <input type="checkbox"/>                                               | .....                              | .....                       | .....          | .....                        | .....        | .....         | .....                    | .....        | .....         |
| other: ..... <input type="checkbox"/>                                               | .....                              | .....                       | .....          | .....                        | .....        | .....         | .....                    | .....        | .....         |

\*1 Indicate construction material and specify:

Combinations possible

specify / comments

- E: earth .....
- S: stone .....
- W: wood .....
- C: concrete .....
- O: other .....

\*<sup>2</sup> Indicate slope (which determines the spacing indicated above): ..... %  
 (add more details on slope / spacing in Annex 3)

If the original slope has changed as a result of the Technology the slope today is (see figure below):..... %

\*<sup>3</sup> eg artificial windbreaks (palisades)

\*<sup>4</sup> Indicate the lateral gradient along the structure: ..... %

\*<sup>5</sup> capacity: ..... m<sup>3</sup>; catchment area: .....; beneficial area (eg where water is applied, area where T. has an effect): .....; slope of: dam wall inside.....%, dam wall outside.....%; dimensions of spillways: ..... m; other specifications: .....

For water harvesting: the ratio between the area where the harvested water is applied and the total area from which water is collected is: 1 : .....

Is vegetation used for stabilisation of structures?      no                       yes

If yes, also fill out vegetative measures 2.5.2

**Different types of structural conservation measures**

**Diversion ditch / drainage:** a graded channel with a supportive ridge or bank on the lower side. It is constructed across a slope and designed to intercept surface runoff and convey it safely to an outlet or waterway.

**Waterways:** are needed to conduct runoff safely from hill slopes to valley bottoms where it can join a stream or river

**Retention / infiltration ditches:** large ditches designed to catch and retain all incoming runoff and hold it until it infiltrates into the ground.

**Pits:** planting holes (for example those used widely in the West African Sahel).

**Sediment / sand trap:** device (either an above ground barrier or a dam wall) built specifically to trap sand or sediments moving in the wind or in water flow.

**Dam / pan / pond:** blockage of watercourse or excavation at a low spot of land to collect water for various purposes.

**Terraces:** involve a more or less permanent change in slope profile.

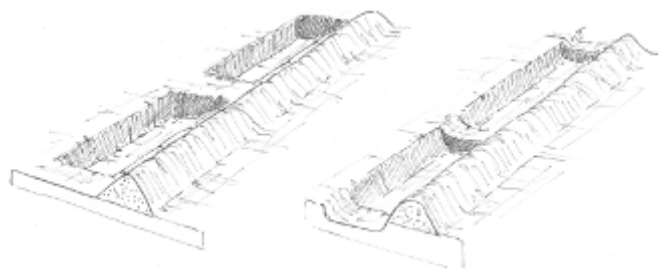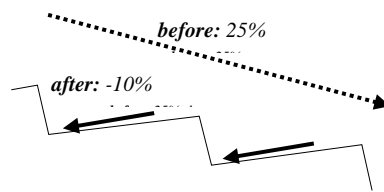

backward sloping bench terrace

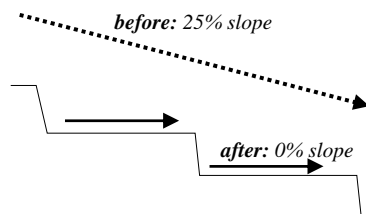

level bench terrace

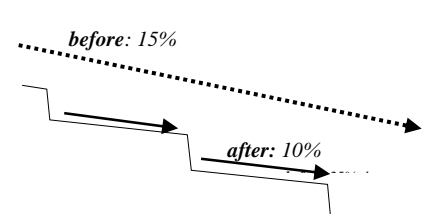

forward sloping bench terrace

**Level bund / bank:** an embankment along the contour made of soil and / or stones with a basin at its upper or lower side. They often develop into forward sloping terraces.

**Graded bund:** same definition as for level bund, with the only difference, that it is slightly graded (with a gradient of up to 1%) towards a waterway or river.

**Walls, barriers:** physical obstacles to movement of soil or sand, eg artificial windbreaks (palisades). Can be made from various materials.

A cross-section of a bund and ditch:

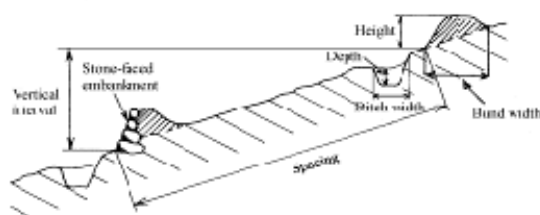

semi-circular bunds:

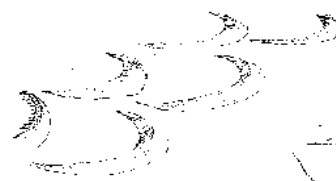

trapezoidal bunds:

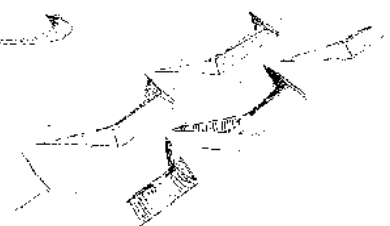

**Example: Type and alignment / layout of structures**

| structures                                                                          | material<br>*1<br>E, S,<br>W, C,<br>O | between structures    |             | dimensions of each structure |           |            |                          |           |            |
|-------------------------------------------------------------------------------------|---------------------------------------|-----------------------|-------------|------------------------------|-----------|------------|--------------------------|-----------|------------|
|                                                                                     |                                       | *2                    |             | ditches / pits / dams        |           |            | bunds / banks / others*3 |           |            |
|                                                                                     |                                       | vertical interval (m) | spacing (m) | depth (m)                    | width (m) | length (m) | height (m)               | width (m) | length (m) |
| diversion ditch / drainage <input checked="" type="checkbox"/>                      | E, S                                  |                       | 100         | 0,8                          | 0,6       | 60         | 0,8                      | 1,5       | 60         |
| waterway <input type="checkbox"/>                                                   | .....                                 | .....                 | .....       | .....                        | .....     | .....      | .....                    | .....     | .....      |
| retention / infiltration ditch / pit, sediment / sand trap <input type="checkbox"/> | .....                                 | .....                 | .....       | .....                        | .....     | .....      | .....                    | .....     | .....      |
| dam / pan / pond <input type="checkbox"/>                                           | .....                                 | .....                 | .....       | .....                        | .....     | .....      | .....                    | .....     | .....      |
| terrace: forward sloping*2/4 <input checked="" type="checkbox"/>                    | E, S                                  | 3                     | 10          | 0,3                          | 0,5       | 5          | 0,3                      | 1,0       | 30         |
| bench level *4 <input type="checkbox"/>                                             | .....                                 | .....                 | .....       | .....                        | .....     | .....      | .....                    | .....     | .....      |
| backward sloping *2/4 <input type="checkbox"/>                                      | .....                                 | .....                 | .....       | .....                        | .....     | .....      | .....                    | .....     | .....      |

\*1 Indicate construction material and specify:

*Combinations possible*

specify / comments:

E: earth

*soil excavated from the ditches is used to build banks*

S: stone

*the cut-off drain is lined with stones, embankment with stones*

W: wood

\*2 Indicate slope (which determines the spacing indicated above):..... 30..... % (add more details on slope / spacing in Annex 3)

If the original slope has changed as a result of the Technology the slope today is (see figure above): .... 8... %

\*3 eg artificial windbreaks (palisades)

\*4 Indicate the lateral gradient along the structure: ..... 0..... %

For water harvesting: the ratio between the area where water is applied and the total area from which water is collected is: **1 :.....**

Is vegetation used for stabilisation of structures?    no     yes

**2.5.3.2 Activities, inputs and costs for structural measures**

**Initial construction**

| Activity | Timing | Input<br><i>select from list below</i> | Quantity<br>(person days, no., kg, l, etc) | Unit*<br>(ha, m, dam) | Total costs<br>local currency | Total costs<br>US\$ | % borne<br>by land user |
|----------|--------|----------------------------------------|--------------------------------------------|-----------------------|-------------------------------|---------------------|-------------------------|
| 1.       |        |                                        |                                            |                       |                               |                     |                         |
| 2.       |        |                                        |                                            |                       |                               |                     |                         |
| 3.       |        |                                        |                                            |                       |                               |                     |                         |
| 4.       |        |                                        |                                            |                       |                               |                     |                         |
| 5.       |        |                                        |                                            |                       |                               |                     |                         |

\* **Unit:** preferably hectares (ha) and if not possible, entity (dam) or length (eg meter of stone line)

**Maintenance / recurrent activities**

| Activity | Timing / frequency * | Input select from list below | Quantity (person days, no., kg, l, etc) | Unit** (ha, m, dam) | Total costs local currency | Total costs US\$ | % borne by land user |
|----------|----------------------|------------------------------|-----------------------------------------|---------------------|----------------------------|------------------|----------------------|
| 1.       |                      |                              |                                         |                     |                            |                  |                      |
|          |                      |                              |                                         |                     |                            |                  |                      |
|          |                      |                              |                                         |                     |                            |                  |                      |
|          |                      |                              |                                         |                     |                            |                  |                      |
| 2.       |                      |                              |                                         |                     |                            |                  |                      |
|          |                      |                              |                                         |                     |                            |                  |                      |
|          |                      |                              |                                         |                     |                            |                  |                      |
|          |                      |                              |                                         |                     |                            |                  |                      |
| 3.       |                      |                              |                                         |                     |                            |                  |                      |
|          |                      |                              |                                         |                     |                            |                  |                      |
|          |                      |                              |                                         |                     |                            |                  |                      |
|          |                      |                              |                                         |                     |                            |                  |                      |
| 4.       |                      |                              |                                         |                     |                            |                  |                      |
|          |                      |                              |                                         |                     |                            |                  |                      |
|          |                      |                              |                                         |                     |                            |                  |                      |
|          |                      |                              |                                         |                     |                            |                  |                      |
| 5.       |                      |                              |                                         |                     |                            |                  |                      |
|          |                      |                              |                                         |                     |                            |                  |                      |
|          |                      |                              |                                         |                     |                            |                  |                      |
|          |                      |                              |                                         |                     |                            |                  |                      |

\* **Timing:** time, at which activity is carried out, eg after harvest of crops, before onset of rains, etc.

**Frequency:** eg annually, each cropping season, etc.

\*\***Unit:** preferably hectares (ha) and if not possible, entity (dam) or length (eg meter of stone line)

**Inputs:**

*Labour<sup>1</sup>*

- labour light (person days)
- labour medium (person days)
- labour heavy (person days)

*Equipment*

- machine hours<sup>2</sup> (h)
- animal traction (h)
- tools
- other (specify)

*Construction material*

- stone (m3)
- wood (m3)
- earth (m3)
- other (specify)

*Agricultural*

- seeds (kg)
- seedlings (No.)
- fertilizer (kg)
- biocides (kg or l active ingredient)
- compost / manure (kg)
- other (specify)

<sup>1</sup> The labour cost should be based on the total person days, be they paid or voluntary and the strenuousness (light, medium, heavy) of the work done. To calculate the US \$ equivalent first indicate daily wage and then multiply the daily wage with the number of person days.

<sup>2</sup> Machine hours: calculation should be based on hiring costs; -- include costs of operation and depreciation.

Specify machinery / tools: .....

Provide **further relevant information** on the structural measures in Annex 3

**Example: Activities, inputs and costs for structural measures**

**Initial construction**

| Activity                                                                                                    | Timing     | Input select from list below | Quantity (person days, no., kg, l, etc) | Unit (ha, m, dam) | Total costs local currency | Total costs US\$ | % borne by land user |
|-------------------------------------------------------------------------------------------------------------|------------|------------------------------|-----------------------------------------|-------------------|----------------------------|------------------|----------------------|
| 1. Farmers cut into the hillside with hoes and drag the soil down to form the risers and level terrace beds | Dry season | labour heavy                 | 100 person days                         | ha                |                            | 216              | 100                  |
|                                                                                                             |            | tools (hand hoe)             |                                         |                   |                            | 5                | 100                  |
|                                                                                                             |            |                              |                                         |                   |                            |                  |                      |
| 2. Risers are then stabilized and compacted by hoe                                                          | Dry season | labour medium                | 25 person days                          | ha                |                            | 54               | 100                  |
|                                                                                                             |            | tools (hand hoe)             |                                         |                   |                            |                  |                      |

**2.5.4 Specifications of management conservation measures**

If in question 2.2.2.2 you have indicated that the SLM Technology consists of a management measure, fill out the following section, otherwise go to 2.6. If management measures include improved vegetation cover, fill also 2.5.2 specifications of vegetative conservation measures. Refer to your drawings in question 2.4. See example below.

**2.5.4.1 Type of management**

Several answers possible

specify:

- change of land use type  .....
- change of land use practices / intensity level  .....
- layout change according to natural and human environment  .....
- major change in timing of activities  .....
- control / change of species composition  .....
- other  .....

**Types of management measures**

**Change of major land use type:** eg enclosure / resting, protection, change from cropland to grazing land, from forest to agroforestry, from grazing land to cropland, from grazing land to forest (afforestation), etc.

**Change of land use practices / intensity level:** eg change from grazing to cutting (for stall feeding), farm enterprise selection (degree of mechanisation, inputs, commercialisation), from mono-cropping to rotational cropping, from continuous cropping to managed fallow, from laissez-faire to managed, from random (open access) to controlled access (grazing land, forest land, eg access to firewood), from herding to fencing, adjusting stocking rates, staged / staggered use ) to minimise exposure to degradation processes (eg staged excavation).

**Layout change according to natural environment and human environment/needs:** eg exclusion of natural waterways and hazardous areas, separation of grazing types, distribution of water points, salt-licks, livestock pens, dips (grazing land); increase of landscape diversity, forest aisle.

**Major change in timing of activities:** eg land preparation, planting, cutting of vegetation.

**Control / change of species composition (not annually or in a rotational sequence: if annually or in a rotational sequence eg on cropland give details in 2.5.2.1):** eg reducing invasive species, selective clearing, encouraging desired / introducing new species, controlled burning (eg prescribed fires in forests / on grazing land)/ residue burning.

**2.5.4.2 Activities, inputs and costs for management measures**

**Initial establishment**

| Activity | Timing | Input<br><i>select from list below</i> | Quantity<br>(person days, no., kg, l, etc) | Unit*<br>(ha, m, dam) | Total costs<br>local currency | Total costs<br>US\$ | % borne<br>by land user |
|----------|--------|----------------------------------------|--------------------------------------------|-----------------------|-------------------------------|---------------------|-------------------------|
| 1.       |        |                                        |                                            |                       |                               |                     |                         |
|          |        |                                        |                                            |                       |                               |                     |                         |
|          |        |                                        |                                            |                       |                               |                     |                         |
|          |        |                                        |                                            |                       |                               |                     |                         |
| 2.       |        |                                        |                                            |                       |                               |                     |                         |
|          |        |                                        |                                            |                       |                               |                     |                         |
|          |        |                                        |                                            |                       |                               |                     |                         |
|          |        |                                        |                                            |                       |                               |                     |                         |
| 3.       |        |                                        |                                            |                       |                               |                     |                         |
|          |        |                                        |                                            |                       |                               |                     |                         |
|          |        |                                        |                                            |                       |                               |                     |                         |
|          |        |                                        |                                            |                       |                               |                     |                         |
| 4.       |        |                                        |                                            |                       |                               |                     |                         |
|          |        |                                        |                                            |                       |                               |                     |                         |
|          |        |                                        |                                            |                       |                               |                     |                         |
|          |        |                                        |                                            |                       |                               |                     |                         |

**Initial establishment**

| Activity | Timing | Input<br><i>select from list below</i> | Quantity<br>(person days, no., kg, l, etc) | Unit*<br>(ha, m, dam) | Total costs<br>local currency | Total costs<br>US\$ | % borne<br>by land user |
|----------|--------|----------------------------------------|--------------------------------------------|-----------------------|-------------------------------|---------------------|-------------------------|
| 5.       |        |                                        |                                            |                       |                               |                     |                         |
|          |        |                                        |                                            |                       |                               |                     |                         |
|          |        |                                        |                                            |                       |                               |                     |                         |
|          |        |                                        |                                            |                       |                               |                     |                         |

\* **Unit:** preferably hectares (ha) and if not possible, entity (dam) or length (eg meter of stone line)

**Maintenance / recurrent activities**

| Activity | Timing/<br>frequency<br>* | Input<br><i>select from list below</i> | Quantity<br>(person days, no., kg, l, etc) | Unit**<br>(ha, m, dam) | Total costs<br>local currency | Total costs<br>US\$ | % borne<br>by land user |
|----------|---------------------------|----------------------------------------|--------------------------------------------|------------------------|-------------------------------|---------------------|-------------------------|
| 1.       |                           |                                        |                                            |                        |                               |                     |                         |
|          |                           |                                        |                                            |                        |                               |                     |                         |
|          |                           |                                        |                                            |                        |                               |                     |                         |
|          |                           |                                        |                                            |                        |                               |                     |                         |
| 2.       |                           |                                        |                                            |                        |                               |                     |                         |
|          |                           |                                        |                                            |                        |                               |                     |                         |
|          |                           |                                        |                                            |                        |                               |                     |                         |
|          |                           |                                        |                                            |                        |                               |                     |                         |
| 3.       |                           |                                        |                                            |                        |                               |                     |                         |
|          |                           |                                        |                                            |                        |                               |                     |                         |
|          |                           |                                        |                                            |                        |                               |                     |                         |
|          |                           |                                        |                                            |                        |                               |                     |                         |
| 4.       |                           |                                        |                                            |                        |                               |                     |                         |
|          |                           |                                        |                                            |                        |                               |                     |                         |
|          |                           |                                        |                                            |                        |                               |                     |                         |
|          |                           |                                        |                                            |                        |                               |                     |                         |
| 5.       |                           |                                        |                                            |                        |                               |                     |                         |
|          |                           |                                        |                                            |                        |                               |                     |                         |
|          |                           |                                        |                                            |                        |                               |                     |                         |
|          |                           |                                        |                                            |                        |                               |                     |                         |

\* **Timing:** time, at which activity is carried out, eg after harvest of crops, before onset of rains, etc.

**Frequency:** eg annually, each cropping season, etc.

\***Unit:** preferably hectares (ha) and if not possible, entity (dam) or length (eg meter of stone line)

**Inputs:**

*Labour<sup>1</sup>*

- labour light (person days)
- labour medium (person days)
- labour heavy (person days)

*Equipment*

- machine hours<sup>2</sup> (h)
- animal traction (h)
- tools
- other (specify)

*Construction material*

- stone (m<sup>3</sup>)
- wood (m<sup>3</sup>)
- earth (m<sup>3</sup>)
- other (specify)

*Agricultural*

- seeds (kg)
- seedlings (No.)
- fertilizer (kg)
- biocides (kg or l active ingredient))
- compost / manure (kg)
- other (specify)

<sup>1</sup> The labour cost should be based on the total person days, be they paid or voluntary and the strenuousness (light, medium, heavy) of the work done. To calculate the US \$ equivalent first indicate daily wage and then multiply the daily wage with the number of person days.

<sup>2</sup> Machine hours: calculation should be based on hiring costs; -- include costs of operation and depreciation

Specify machinery / tools: .....

Provide **further relevant information** on the management measures in Annex 3.



**Example: Activities, inputs and costs for management measures****Initial establishment**

| Activity                                                                                                                                                          | Timing | Input<br><i>select from list below</i> | Quantity<br>(person days, no., kg, l, etc) | Unit*<br>(ha, m, dam) | Total costs<br>local<br>currency | Total<br>costs<br>US\$ | % borne<br>by land<br>user |
|-------------------------------------------------------------------------------------------------------------------------------------------------------------------|--------|----------------------------------------|--------------------------------------------|-----------------------|----------------------------------|------------------------|----------------------------|
| 1. Introduction of social fencing system                                                                                                                          |        |                                        |                                            |                       |                                  |                        |                            |
|                                                                                                                                                                   |        |                                        |                                            |                       |                                  |                        |                            |
|                                                                                                                                                                   |        |                                        |                                            |                       |                                  |                        |                            |
|                                                                                                                                                                   |        |                                        |                                            |                       |                                  |                        |                            |
| 2. Construction of: a series of staggered contour trenches on slopes, stone/earth/wood check dams in gullies, graded stabilization channels which capture runoff, |        | <i>labour heavy</i>                    | <i>70 person days</i>                      | <i>ha</i>             |                                  | <i>140</i>             | <i>5</i>                   |
|                                                                                                                                                                   |        | <i>machines</i>                        | <i>30 h</i>                                | <i>ha</i>             |                                  | <i>70</i>              | <i>0</i>                   |
|                                                                                                                                                                   |        | <i>wood</i>                            | <i>1000 kg</i>                             | <i>ha</i>             |                                  | <i>5</i>               | <i>0</i>                   |
|                                                                                                                                                                   |        | <i>stones</i>                          | <i>3000 kg</i>                             | <i>ha</i>             |                                  |                        |                            |
|                                                                                                                                                                   |        |                                        |                                            |                       |                                  |                        |                            |
| 3. Construction earth dam wall for water harvesting and concrete pipelines for irrigation                                                                         |        | <i>labour medium</i>                   | <i>50 person days</i>                      | <i>ha</i>             |                                  | <i>100</i>             | <i>5</i>                   |
|                                                                                                                                                                   |        | <i>machines</i>                        | <i>40 h</i>                                | <i>ha</i>             |                                  | <i>55</i>              | <i>0</i>                   |
|                                                                                                                                                                   |        | <i>earth</i>                           | <i>700 m<sup>3</sup></i>                   | <i>ha</i>             |                                  | <i>20</i>              | <i>0</i>                   |
|                                                                                                                                                                   |        | <i>pipelines</i>                       | <i>4</i>                                   | <i>20 ha</i>          |                                  |                        |                            |
|                                                                                                                                                                   |        |                                        |                                            |                       |                                  |                        |                            |
| 4. Enrichment planting of tree seedlings on bunds and hill slopes                                                                                                 |        | <i>labour medium</i>                   | <i>5 person days</i>                       | <i>ha</i>             |                                  | <i>10</i>              | <i>5</i>                   |
|                                                                                                                                                                   |        | <i>seedlings</i>                       | <i>200</i>                                 | <i>ha</i>             |                                  | <i>50</i>              | <i>0</i>                   |
|                                                                                                                                                                   |        |                                        |                                            |                       |                                  |                        |                            |
|                                                                                                                                                                   |        |                                        |                                            |                       |                                  |                        |                            |

## 2.6 Overview of costs

In 2.5.1, 2.5.2, 2.5.3, 2.5.4 you indicated the costs for agronomic, vegetative, structural and management measures. Please add up the totals for the different inputs and insert them into the cost summary table below. For comparison reason, convert all costs into US\$ per hectare. If still not possible specify unit (eg. dam)

Indicate exchange rate used: 1 US\$ equals .....; Name of local currency: .....  
 Indicate daily wage cost of hired labour to implement conservation measures: .....US\$ per person per day

### 2.6.1 Establishment and maintenance / recurrent costs

Average costs (in US\$)

| Inputs                       | <u>Establishment costs</u> * <sup>1</sup> |                  | % of costs borne by land user | <u>Maintenance / recurrent costs (annual)</u> |                  | % of costs borne by land user |        |
|------------------------------|-------------------------------------------|------------------|-------------------------------|-----------------------------------------------|------------------|-------------------------------|--------|
|                              | US\$ per unit                             | US\$ per hectare |                               | US\$ per unit                                 | US\$ per hectare |                               |        |
| <b>Labour</b>                |                                           |                  |                               |                                               |                  |                               |        |
| (voluntary and paid)         | .....                                     | .....            | .....                         | .....                                         | .....            | .....                         |        |
| <b>Equipment</b>             |                                           |                  |                               |                                               |                  |                               |        |
| machine use                  | .....                                     | .....            | .....                         | .....                                         | .....            | .....                         |        |
| animal traction              | .....                                     | .....            | .....                         | .....                                         | .....            | .....                         |        |
| tools                        | .....                                     | .....            | .....                         | .....                                         | .....            | .....                         |        |
| other (specify):             | .....                                     | .....            | .....                         | .....                                         | .....            | .....                         |        |
| .....                        | .....                                     | .....            | .....                         | .....                                         | .....            | .....                         |        |
| <b>Construction material</b> |                                           |                  |                               |                                               |                  |                               |        |
| stone                        | .....                                     | .....            | .....                         | .....                                         | .....            | .....                         |        |
| wood                         | .....                                     | .....            | .....                         | .....                                         | .....            | .....                         |        |
| earth                        | .....                                     | .....            | .....                         | .....                                         | .....            | .....                         |        |
| other (specify):             | .....                                     | .....            | .....                         | .....                                         | .....            | .....                         |        |
| .....                        | .....                                     | .....            | .....                         | .....                                         | .....            | .....                         |        |
| <b>Agricultural</b>          |                                           |                  |                               |                                               |                  |                               |        |
| seeds                        | .....                                     | .....            | .....                         | .....                                         | .....            | .....                         |        |
| seedlings                    | .....                                     | .....            | .....                         | .....                                         | .....            | .....                         |        |
| fertilizer                   | .....                                     | .....            | .....                         | .....                                         | .....            | .....                         |        |
| biocides                     | .....                                     | .....            | .....                         | .....                                         | .....            | .....                         |        |
| compost/manure               | .....                                     | .....            | .....                         | .....                                         | .....            | .....                         |        |
| other (specify):             | .....                                     | .....            | .....                         | .....                                         | .....            | .....                         |        |
| .....                        | .....                                     | .....            | .....                         | .....                                         | .....            | .....                         |        |
| <b>Others (specify):</b>     |                                           |                  |                               |                                               |                  |                               |        |
| .....                        | .....                                     | .....            | .....                         | .....                                         | .....            | .....                         |        |
| .....                        | .....                                     | .....            | .....                         | .....                                         | .....            | .....                         |        |
| .....                        | .....                                     | .....            | .....                         | .....                                         | .....            | .....                         |        |
| <b>Total</b> * <sup>2</sup>  | =                                         | ..... US\$       | .....%                        | <b>Total</b> * <sup>2</sup>                   | =                | ..... US\$                    | .....% |

\*<sup>1</sup> Indicate duration of establishment phase: ..... month(s)

\*<sup>2</sup> Indicate the total costs and percentage borne by land users even if you cannot give the details above!!!

**2.6.2 Describe the most determinate factors affecting the costs (eg slope, soil depth, labour etc.)**

.....  
.....  
.....  
.....

Indicate for which situation the above costs in 2.6.1 were calculated (eg length of structure, wind breaks, grass strips, etc. per ha of land affected / protected), indicate the date for which the costs apply and give additional comments

.....  
.....  
.....  
.....

## 2.7 Natural environment

Give details of the natural (bio-physical) conditions where the SLM Technology is applied.

**Circles always require ranking!** It is possible to give more than one option the same rank.  
 Use only ranks 1, 2 or 3 (1 = very important / large extent; 2 = important / medium extent; 3 = less important / little extent)  
**Make use of the specify/remark/comments column or line as much as possible!**

|                                      | Rank according to areal extent (max. 2 circles per question) | Comments                                                                                                             |
|--------------------------------------|--------------------------------------------------------------|----------------------------------------------------------------------------------------------------------------------|
| <b>2.7.1 Average annual rainfall</b> |                                                              | Indicate average annual rainfall and seasonality (eg monsoon, winter-/summer rains)/ length of dry periods if known. |
| < 250 mm                             | <input type="radio"/>                                        | .....                                                                                                                |
| 250-500 mm                           | <input type="radio"/>                                        | .....                                                                                                                |
| 500-750 mm                           | <input type="radio"/>                                        | .....                                                                                                                |
| 750-1000 mm                          | <input type="radio"/>                                        | .....                                                                                                                |
| 1000-1500 mm                         | <input type="radio"/>                                        | .....                                                                                                                |
| 1500-2000 mm                         | <input type="radio"/>                                        | .....                                                                                                                |
| 2000-3000 mm                         | <input type="radio"/>                                        | .....                                                                                                                |
| 3000-4000 mm                         | <input type="radio"/>                                        | .....                                                                                                                |
| > 4000 mm                            | <input type="radio"/>                                        | .....                                                                                                                |
| <b>2.7.2 Agro-climatic zone</b>      |                                                              |                                                                                                                      |
| humid                                | <input type="radio"/>                                        | .....                                                                                                                |
| subhumid                             | <input type="radio"/>                                        | .....                                                                                                                |
| semi-arid                            | <input type="radio"/>                                        | .....                                                                                                                |
| arid                                 | <input type="radio"/>                                        | .....                                                                                                                |

**Agro-climatic zone**

- **Humid:** length of growing period (LGP) > 270 days
- **Subhumid:** LGP 180 – 269 days
- **Semi-arid:** LGP 75 – 179 days
- **Arid:** LGP 0 – 74 days

The length of growing period (LGP) is defined as the period when precipitation > 0.5 PET (potential evapotranspiration) and the temperature > 6.5° C.

|                                             |                       |       |
|---------------------------------------------|-----------------------|-------|
| <b>2.7.3 Thermal climate classification</b> |                       |       |
| tropics                                     | <input type="radio"/> | ..... |
| subtropics                                  | <input type="radio"/> | ..... |
| temperate                                   | <input type="radio"/> | ..... |
| boreal                                      | <input type="radio"/> | ..... |
| polar/arctic                                | <input type="radio"/> | ..... |

**Thermal climate classes** (all temperatures indicated as monthly mean temperatures corrected to sea level)

- **Tropics:** All months above 18° C
- **Subtropics:** One or more than one month below 18° C but above 5° C
- **Temperate:** At least 1 month with monthly mean temperatures below 5° C and 4 or more months above 10° C
- **Boreal:** At least one month below 5° C and more than one but below four months above 10° C
- **Polar / arctic:** All months below 10° C

Source (FAO 2000)

**2.7.4 Number of growing seasons per year**

1  2  3

growing period: length in days (approximately) from which month to which month:

longest .....

2<sup>nd</sup> longest .....

*Number of growing seasons per year: A growing season is a period of time where there is sufficient rainfall and moisture in the soil as well as high enough temperatures to grow a crop. A growing season can have several crops following each other.*

**2.7.5 Under climatic extremes the Technology is tolerant of or sensitive to:**

|                                                | tolerant                 | sensitive                | not known                |
|------------------------------------------------|--------------------------|--------------------------|--------------------------|
| temperature increase                           | <input type="checkbox"/> | <input type="checkbox"/> | <input type="checkbox"/> |
| seasonal rainfall increase                     | <input type="checkbox"/> | <input type="checkbox"/> | <input type="checkbox"/> |
| seasonal rainfall decrease                     | <input type="checkbox"/> | <input type="checkbox"/> | <input type="checkbox"/> |
| heavy rainfall events (intensities and amount) | <input type="checkbox"/> | <input type="checkbox"/> | <input type="checkbox"/> |
| windstorms / dust storms                       | <input type="checkbox"/> | <input type="checkbox"/> | <input type="checkbox"/> |
| floods                                         | <input type="checkbox"/> | <input type="checkbox"/> | <input type="checkbox"/> |
| droughts / dry spells                          | <input type="checkbox"/> | <input type="checkbox"/> | <input type="checkbox"/> |
| decreasing length of growing period            | <input type="checkbox"/> | <input type="checkbox"/> | <input type="checkbox"/> |
| others (specify):.....                         | <input type="checkbox"/> | <input type="checkbox"/> | <input type="checkbox"/> |

If the Technology was modified to become more tolerant give details of adaptive changes (design, material/species) or Indicate how the Technology could be modified to become more tolerant (design, material/species): .....

.....

.....

.....

.....

.....

| <i>Rank according to areal extent (max. 2 circles per question)</i> | <b>Comments</b> |
|---------------------------------------------------------------------|-----------------|
|---------------------------------------------------------------------|-----------------|

**2.7.6 Altitudinal zonation**

|                    |                       |       |
|--------------------|-----------------------|-------|
| 0-100 m a.s.l.     | <input type="radio"/> | ..... |
| 100-500 m a.s.l.   | <input type="radio"/> | ..... |
| 500-1000 m a.s.l.  | <input type="radio"/> | ..... |
| 1000-1500 m a.s.l. | <input type="radio"/> | ..... |
| 1500-2000 m a.s.l. | <input type="radio"/> | ..... |
| 2000-2500 m a.s.l. | <input type="radio"/> | ..... |
| 2500-3000 m a.s.l. | <input type="radio"/> | ..... |
| 3000-4000 m a.s.l. | <input type="radio"/> | ..... |
| > 4000 m a.s.l.    | <input type="radio"/> | ..... |

|                        | <i>Rank according to areal extent (max. 2 circles per question)</i> | <b>Comments</b>                                                                |
|------------------------|---------------------------------------------------------------------|--------------------------------------------------------------------------------|
| <b>2.7.7 Landforms</b> |                                                                     | Indicate if Technology is specifically applied in convex or concave situations |
| plateau / plains       | <input type="radio"/>                                               | .....                                                                          |
| ridges                 | <input type="radio"/>                                               | .....                                                                          |
| mountain slopes        | <input type="radio"/>                                               | .....                                                                          |
| hill slopes            | <input type="radio"/>                                               | .....                                                                          |
| footslopes             | <input type="radio"/>                                               | .....                                                                          |
| valley floors          | <input type="radio"/>                                               | .....                                                                          |

*Landforms (modified after ISRIC 1993):*

- **Plateau / plains:** extended level land (slopes less than 8 %).
- **Ridges:** narrow elongated area rising above the surrounding area, often hilltops or mountain-tops.
- **Mountain slopes (including major escarpments):** extended area with altitude differences of more than 600 m per 2 km and slopes greater than 15 %.
- **Hill slopes (including valley and minor escarpment slopes):** altitude difference of less than 600 m per 2 km and slopes greater than 8 %.
- **Footslopes:** zone bordering steeper mountain / hill slopes on one side and valley floors / plains / plateaus on the other side.
- **Valley floors:** elongated strips of level land (less than 8 % slope), flanked by sloping or steep land on both sides.

*convex:* swell (diversion of water flow)

*concave:* depression (conversion of water flow)

Some of the following ‘environmental’ conditions (questions 2.7.8. – 2.7.18) may change as a result of the SLM Technology! However, **describe the conditions without any impact of land conservation!**

**2.7.8 Slopes on average**

|            |          |                       |       |
|------------|----------|-----------------------|-------|
| flat       | (0-2 %)  | <input type="radio"/> | ..... |
| gentle     | (2-5%)   | <input type="radio"/> | ..... |
| moderate   | (5-8%)   | <input type="radio"/> | ..... |
| rolling    | (8-16%)  | <input type="radio"/> | ..... |
| hilly      | (16-30%) | <input type="radio"/> | ..... |
| steep      | (30-60%) | <input type="radio"/> | ..... |
| very steep | (>60%)   | <input type="radio"/> | ..... |

**Slope gradient conversion table:**

| Slope in percent | Slope in degrees |
|------------------|------------------|
| 2 %              | 1 °              |
| 5 %              | 3 °              |
| 8 %              | 5 °              |
| 16 %             | 9 °              |
| 30 %             | 17 °             |
| 60 %             | 31 °             |
| 100 %            | 45 °             |

|                                            |                        | <i>Rank according to<br/>areal extent (max.<br/>2 circles per<br/>question)</i> | <b>Comments</b> |
|--------------------------------------------|------------------------|---------------------------------------------------------------------------------|-----------------|
| <b>2.7.9 Soil depth on average</b>         |                        |                                                                                 |                 |
| very shallow                               | (0-20 cm)              | <input type="radio"/>                                                           | .....           |
| shallow                                    | (20-50 cm)             | <input type="radio"/>                                                           | .....           |
| moderately deep                            | (50-80 cm)             | <input type="radio"/>                                                           | .....           |
| deep                                       | (80-120 cm)            | <input type="radio"/>                                                           | .....           |
| very deep                                  | (>120 cm)              | <input type="radio"/>                                                           | .....           |
| <b>2.7.10 Soil texture</b>                 |                        |                                                                                 |                 |
| coarse / light                             | (sandy)                | <input type="radio"/>                                                           | .....           |
| medium                                     | (loam)                 | <input type="radio"/>                                                           | .....           |
| fine / heavy                               | (clay)                 | <input type="radio"/>                                                           | .....           |
| <b>2.7.11 Soil fertility</b>               |                        |                                                                                 |                 |
| very high                                  |                        | <input type="radio"/>                                                           | .....           |
| high                                       |                        | <input type="radio"/>                                                           | .....           |
| medium                                     |                        | <input type="radio"/>                                                           | .....           |
| low                                        |                        | <input type="radio"/>                                                           | .....           |
| very low                                   |                        | <input type="radio"/>                                                           | .....           |
| <b>2.7.12 Topsoil organic matter</b>       |                        |                                                                                 |                 |
| high                                       | (>3%)                  | <input type="radio"/>                                                           | .....           |
| medium                                     | (1-3%)                 | <input type="radio"/>                                                           | .....           |
| low                                        | (<1%)                  | <input type="radio"/>                                                           | .....           |
| <b>2.7.13 Soil drainage / infiltration</b> |                        |                                                                                 |                 |
| good                                       |                        | <input type="radio"/>                                                           | .....           |
| medium                                     |                        | <input type="radio"/>                                                           | .....           |
| poor                                       | (eg sealing /crusting) | <input type="radio"/>                                                           | .....           |
| <b>2.7.14 Soil water storage capacity</b>  |                        |                                                                                 |                 |
| very high                                  |                        | <input type="radio"/>                                                           | .....           |
| high                                       |                        | <input type="radio"/>                                                           | .....           |
| medium                                     |                        | <input type="radio"/>                                                           | .....           |
| low                                        |                        | <input type="radio"/>                                                           | .....           |
| very low                                   |                        | <input type="radio"/>                                                           | .....           |

|                                                        | <i>Rank according to areal extent (max. 2 circles per question)</i> | <b>Comments</b>                                          |
|--------------------------------------------------------|---------------------------------------------------------------------|----------------------------------------------------------|
| <b>2.7.15 Ground water table</b>                       |                                                                     |                                                          |
| on surface                                             | <input type="radio"/>                                               | .....                                                    |
| < 5 m                                                  | <input type="radio"/>                                               | .....                                                    |
| 5 – 50 m                                               | <input type="radio"/>                                               | .....                                                    |
| > 50 m                                                 | <input type="radio"/>                                               | .....                                                    |
| <b>2.7.16 Availability of surface water</b>            |                                                                     | describe seasonal fluctuations                           |
| excess (eg flood)                                      | <input type="radio"/>                                               | .....                                                    |
| good                                                   | <input type="radio"/>                                               | .....                                                    |
| medium                                                 | <input type="radio"/>                                               | .....                                                    |
| poor / none                                            | <input type="radio"/>                                               | .....                                                    |
| <b>2.7.17 Water quality (untreated)</b>                |                                                                     | describe seasonality and source (ground-/ surface water) |
| good drinking water                                    | <input type="radio"/>                                               | .....                                                    |
| poor drinking water                                    | <input type="radio"/>                                               | .....                                                    |
| for agricultural use only                              | <input type="radio"/>                                               | .....                                                    |
| unusable                                               | <input type="radio"/>                                               | .....                                                    |
| <b>2.7.18 Biodiversity* (species/habitat richness)</b> |                                                                     | specify                                                  |
| high                                                   | <input type="radio"/>                                               | .....                                                    |
| medium                                                 | <input type="radio"/>                                               | .....                                                    |
| low                                                    | <input type="radio"/>                                               | .....                                                    |

*\* Consider biodiversity as a whole and indicate the state of biodiversity relative to your region/country. Biodiversity combines habitat and species richness whereas species richness includes all fauna and flora above ground and in the soil. If useful give further information in the field 'specify'.*



## 2.8 Human environment and land use

Provide data for the land users who apply the Technology

### 2.8.1 Land users applying the Technology

tick one option per line

|                                                 |                                                      |                                                   |                                                         |
|-------------------------------------------------|------------------------------------------------------|---------------------------------------------------|---------------------------------------------------------|
| Individual/household <input type="checkbox"/>   | groups / community <input type="checkbox"/>          | cooperative <input type="checkbox"/>              | employee (company, government) <input type="checkbox"/> |
| Small scale land users <input type="checkbox"/> | medium scale land users <input type="checkbox"/>     | large scale land users <input type="checkbox"/>   |                                                         |
| Leaders / privileged <input type="checkbox"/>   | common / average land users <input type="checkbox"/> | disadvantaged land users <input type="checkbox"/> |                                                         |
| Mainly women <input type="checkbox"/>           | mainly men <input type="checkbox"/>                  | mixed <input type="checkbox"/>                    |                                                         |

If there is a difference in the involvement of women and men, explain the reasons and roles: .....

.....

.....

### 2.8.2 Population density

|                                                         |                                                          |
|---------------------------------------------------------|----------------------------------------------------------|
| < 10 persons/km <sup>2</sup> <input type="checkbox"/>   | 100-200 persons/km <sup>2</sup> <input type="checkbox"/> |
| 10-50 persons/km <sup>2</sup> <input type="checkbox"/>  | 200-500 persons/km <sup>2</sup> <input type="checkbox"/> |
| 50-100 persons/km <sup>2</sup> <input type="checkbox"/> | > 500 persons/km <sup>2</sup> <input type="checkbox"/>   |

### 2.8.3 Annual population growth

negative  specify ..... %

< 0.5 %

0.5 % -1 %

1 % -2 %

2 % -3 %

3 % -4 %

> 4 %  specify ..... %

### 2.8.4 Who owns the land and what are the land and water use rights?

rank according to areal extent (max. 2 circles per question)

| Land ownership         |                       | Rights:                   | Land use rights       | Water use rights*     |
|------------------------|-----------------------|---------------------------|-----------------------|-----------------------|
| state                  | <input type="radio"/> | open access (unorganised) | <input type="radio"/> | <input type="radio"/> |
| company                | <input type="radio"/> | communal (organised)      | <input type="radio"/> | <input type="radio"/> |
| communal / village     | <input type="radio"/> | leased                    | <input type="radio"/> | <input type="radio"/> |
| group                  | <input type="radio"/> | individual                | <input type="radio"/> | <input type="radio"/> |
| individual, not titled | <input type="radio"/> | other (specify): .....    | <input type="radio"/> | <input type="radio"/> |
| individual, titled     | <input type="radio"/> |                           |                       |                       |
| other (specify):.....  | <input type="radio"/> |                           |                       |                       |

Comments: .....

.....

\* if water use rights are relevant

**Land ownership** is the type of land possession, while **land use rights** refer to the access to land.

**Land use rights / water use rights:**

- *Open access: means free for all.*
- *Communal (organised): means subject to community-agreed management rules.*
- *Leased: right to use land for a limited period of time against payment (contract).*
- *Individual: right of use by single user.*

**2.8.5 Relative level of wealth**

|           | How wealthy are the land users <b>who apply the SLM Technology?</b> ( <i>rank and specify</i> ) | What % of the land users in the area fall into the following categories? | What % of the total land area does each category own? |
|-----------|-------------------------------------------------------------------------------------------------|--------------------------------------------------------------------------|-------------------------------------------------------|
| very rich | <input type="radio"/> .....                                                                     | .....%                                                                   | .....%                                                |
| rich      | <input type="radio"/> .....                                                                     | .....%                                                                   | .....%                                                |
| average   | <input type="radio"/> .....                                                                     | .....%                                                                   | .....%                                                |
| poor      | <input type="radio"/> .....                                                                     | .....%                                                                   | .....%                                                |
| very poor | <input type="radio"/> .....                                                                     | .....%                                                                   | .....%                                                |
|           |                                                                                                 | 100%                                                                     | 100%                                                  |

**Wealth:** For classification in your area please use local instead of international standards.

**2.8.6 How significant is off-farm income for the land users who apply the SLM Technology?**

less than 10% of all income  10-50%  > 50%

Specify (eg compared to land users who have not implemented conservation measures): .....

.....

.....

**Off-farm income:** income other than from the use of cropland, grazing land, forest and mixed land (eg business, trade, manufacturing, industry).

**2.8.7 Access to services and infrastructure:**

|                               | low                      | moderate                 | high                     |
|-------------------------------|--------------------------|--------------------------|--------------------------|
| health                        | <input type="checkbox"/> | <input type="checkbox"/> | <input type="checkbox"/> |
| education                     | <input type="checkbox"/> | <input type="checkbox"/> | <input type="checkbox"/> |
| technical assistance          | <input type="checkbox"/> | <input type="checkbox"/> | <input type="checkbox"/> |
| employment (eg off-farm)      | <input type="checkbox"/> | <input type="checkbox"/> | <input type="checkbox"/> |
| market                        | <input type="checkbox"/> | <input type="checkbox"/> | <input type="checkbox"/> |
| energy                        | <input type="checkbox"/> | <input type="checkbox"/> | <input type="checkbox"/> |
| roads & transport             | <input type="checkbox"/> | <input type="checkbox"/> | <input type="checkbox"/> |
| drinking water and sanitation | <input type="checkbox"/> | <input type="checkbox"/> | <input type="checkbox"/> |
| financial services            | <input type="checkbox"/> | <input type="checkbox"/> | <input type="checkbox"/> |
| other (specify):              | <input type="checkbox"/> | <input type="checkbox"/> | <input type="checkbox"/> |
| .....                         |                          |                          |                          |

**2.8.8 For cropland and cropland mixed with another land use type: under which of the following conditions is the Technology applied?**

If the Technology is not applied on cropland (incl. mixed land), go to question 2.8.9.

**2.8.8.1 Market orientation of production system**

|                                    |                       |          |
|------------------------------------|-----------------------|----------|
|                                    |                       | comments |
| subsistence (self-supply)          | <input type="radio"/> | .....    |
| mixed (subsistence and commercial) | <input type="radio"/> | .....    |
| commercial / market                | <input type="radio"/> | .....    |
| other: .....                       | <input type="radio"/> | .....    |
| other: .....                       | <input type="radio"/> | .....    |

Is production subsidised?    no     yes, little     yes, moderately     yes, highly

*Subsidy: a subsidy is an instrument used by the state or by private actors to reduce the costs of a product or increase the returns from a particular activity (Kerr, 1994). It may be provided in cash or in kind and usually serves a specific purpose.*

**2.8.8.2 How is land cultivation performed?**

|                 |                       |          |
|-----------------|-----------------------|----------|
|                 |                       | comments |
| manual labour   | <input type="radio"/> | .....    |
| animal traction | <input type="radio"/> | .....    |
| mechanised      | <input type="radio"/> | .....    |

**2.8.8.3 Type of cropping system and major crops**

|                                                                                       |                       |                 |                 |       |
|---------------------------------------------------------------------------------------|-----------------------|-----------------|-----------------|-------|
|                                                                                       |                       | major cash crop | major food crop | other |
| annual cropping                                                                       | <input type="radio"/> | .....           | .....           | ..... |
| perennial (non-woody) cropping                                                        | <input type="radio"/> | .....           | .....           | ..... |
| tree/shrub cropping                                                                   | <input type="radio"/> | .....           | .....           | ..... |
| mixed (different land use types on same land unit, eg agroforestry, agropastoralism): |                       |                 |                 |       |
| specify:.....                                                                         | <input type="radio"/> | .....           | .....           | ..... |
| specify:.....                                                                         | <input type="radio"/> | .....           | .....           | ..... |
| Other, specify: .....                                                                 | <input type="radio"/> | .....           | .....           | ..... |

**Comments:** .....

For definitions of land use type see page QT7

**2.8.8.4 Water supply**

rainfed     post-flooding     mixed rainfed - irrigated     full irrigation

**Rainfed:** crop(s) establishment and development is completely determined by rainfall.

**Post-flooding:** after rainwater has naturally flooded the field (eg in Wadis, river banks), the water infiltrated into the soil is used intentionally as a water reserve for crop cultivation. The crop(s) use(s) this water reserve for establishment.

**Mixed rainfed – irrigated:** the application of a limited amount of water to the crop when rainfall fails to provide sufficient water for plant growth, to increase and stabilise yield; the additional water alone is inadequate for crop production.

**Full irrigation:** any of several means of an artificial regular supply of water, in addition to rain, to the crop(s).

**2.8.8.5 Livestock**

Is livestock grazing on crop residues: no     yes little     yes

If considered important also fill in section 2.8.9 (mixed system)

**2.8.8.6 Size of cropland per household**

|                 |                       | comments |
|-----------------|-----------------------|----------|
| < 0.5 ha        | <input type="radio"/> | .....    |
| 0.5-1 ha        | <input type="radio"/> | .....    |
| 1-2 ha          | <input type="radio"/> | .....    |
| 2-5 ha          | <input type="radio"/> | .....    |
| 5-15 ha         | <input type="radio"/> | .....    |
| 15-50 ha        | <input type="radio"/> | .....    |
| 50-100 ha       | <input type="radio"/> | .....    |
| 100-500 ha      | <input type="radio"/> | .....    |
| 500-1,000 ha    | <input type="radio"/> | .....    |
| 1,000–10,000 ha | <input type="radio"/> | .....    |
| >10,000ha       | <input type="radio"/> | .....    |

*Size of cropland: all cultivated area used per household, not just where Technology is applied*

*Provide further relevant information about the cropland systems (eg trends in agronomic or vegetative practices) in Annex 3.*

**2.8.9 For grazing land and grazing land mixed with another land use type: under which of the following conditions is the Technology applied?**

*If Technology is not applied on grazing land (including mixed land), go to question 2.8.10. For definitions of land use types see page QT7.*

**2.8.9.1 Market orientation of production system**

|                                    |                       | comments |
|------------------------------------|-----------------------|----------|
| subsistence (self-supply)          | <input type="radio"/> | .....    |
| mixed (subsistence and commercial) | <input type="radio"/> | .....    |
| commercial / market                | <input type="radio"/> | .....    |
| other: .....                       | <input type="radio"/> | .....    |

Is production subsidised?    no     yes, little     yes, moderately     yes, highly

*Subsidy: a subsidy is an instrument used by the state or by private actors to reduce the costs of a product or increase the returns from a particular activity (Kerr, 1994). It may be provided in cash or in kind and usually serves a specific purpose.*

**2.8.9.2 Type of grazing system**

|                                                 |                       | main livestock species* / secondary livestock species |
|-------------------------------------------------|-----------------------|-------------------------------------------------------|
| extensive grazing land:                         |                       |                                                       |
| - nomadism                                      | <input type="radio"/> | .....                                                 |
| - semi-nomadism / pastoralism                   | <input type="radio"/> | .....                                                 |
| - ranching                                      | <input type="radio"/> | .....                                                 |
| intensive grazing land                          |                       |                                                       |
| - cut-and-carry/zero grazing                    | <input type="radio"/> | .....                                                 |
| - improved pasture                              | <input type="radio"/> | .....                                                 |
| mixed: (eg agro-pastoralism, silvo-pastoralism) | <input type="radio"/> | .....                                                 |
| specify: .....                                  | <input type="radio"/> | .....                                                 |

\* if wildlife is major part of the grazing system list species

**Comments:** .....

**Extensive grazing land:** grazing on natural or semi-natural grasslands, grasslands with trees / shrubs (savannah vegetation) or open woodlands for livestock and wildlife.

- **Nomadism:** people move with animals.
- **Semi-nomadism / pastoralism:** animal owners have a permanent place of residence where supplementary cultivation is practiced. Herds are moved to distant grazing grounds.
- **Ranching:** grazing within well-defined boundaries, movements cover smaller distances and management inputs are higher compared to semi-nomadism.

**Intensive grazing land:** grass production on improved or planted pastures, including cutting for fodder material (for livestock production).

- **Cut-and-carry/zero grazing:** Carrying fodder to animals confined to a stall / shed or another restricted area; in zero grazing systems the livestock are not permitted to graze at any time
- **Improved pasture:** pasture that is sown with a mixture of introduced grasses and legumes (can be fertilized and/or inoculated with rhizobia to fix nitrogen). (<http://www.environment.gov.au/soe/2001/land/glossary.html>)
- **Definitions for mixed land:** see page QT7

**2.8.9.3 Water supply:**

rained  post-flooding  mixed rained - irrigated  full irrigation

**2.8.9.4 Livestock density**

|                           |                          |                            |                          |
|---------------------------|--------------------------|----------------------------|--------------------------|
| < 1 LU/km <sup>2</sup>    | <input type="checkbox"/> | 25-50 LU /km <sup>2</sup>  | <input type="checkbox"/> |
| 1-10 LU /km <sup>2</sup>  | <input type="checkbox"/> | 50-100 LU /km <sup>2</sup> | <input type="checkbox"/> |
| 10-25 LU /km <sup>2</sup> | <input type="checkbox"/> | > 100 LU /km <sup>2</sup>  | <input type="checkbox"/> |

Livestock unit (LU) is a standardized animal unit obtained by multiplying total number of animals with a conversion factor that takes into account 'feed requirements' per animal (cattle: 0.7, sheep/goats 0.1, pigs, 0.25, camels 1.1). Source (FAO 2000)

**2.8.9.5 Size of grazing land per household**

|                 | comments                    |
|-----------------|-----------------------------|
| < 0.5 ha        |                             |
| 0.5-1 ha        | <input type="radio"/> ..... |
| 1-2 ha          | <input type="radio"/> ..... |
| 2-5 ha          | <input type="radio"/> ..... |
| 5-15 ha         | <input type="radio"/> ..... |
| 15-50 ha        | <input type="radio"/> ..... |
| 50-100 ha       | <input type="radio"/> ..... |
| 100-500 ha      | <input type="radio"/> ..... |
| 500-1,000 ha    | <input type="radio"/> ..... |
| 1,000-10,000 ha | <input type="radio"/> ..... |
| >10,000ha       | <input type="radio"/> ..... |

Size of grazing land: all grazing area used per household, not just where Technology is applied.

Provide **further relevant information** about the grazing land system and livestock production (eg trends in use of area closure, stall feeding, herd ownership etc.) in Annex 3.

**2.8.10 For forest / woodland: under which of the following conditions is the Technology applied?**

If Technology is not applied on forest / woodland, go to question 2.8.11; for definitions of land use types see page QT7.

Agroforestry systems are treated under the previous cropland or grazing land sections.

**2.8.10.1 Market orientation of production system**

|                                    |                                                                                                                                                | comments |
|------------------------------------|------------------------------------------------------------------------------------------------------------------------------------------------|----------|
| subsistence (self-supply)          | <input type="radio"/>                                                                                                                          | .....    |
| mixed (subsistence and commercial) | <input type="radio"/>                                                                                                                          | .....    |
| commercial / market                | <input type="radio"/>                                                                                                                          | .....    |
| other (specify) .....              | <input type="radio"/>                                                                                                                          | .....    |
| other (specify) .....              | <input type="radio"/>                                                                                                                          | .....    |
| Is production subsidised?          | no <input type="checkbox"/> yes, little <input type="checkbox"/> yes, moderately <input type="checkbox"/> yes, highly <input type="checkbox"/> |          |

*Subsidy: a subsidy is an instrument used by the state or by private actors to reduce the costs of a product or increase the returns from a particular activity (Kerr, 1994). It may be provided in cash or in kind and usually serves a specific purpose.*

**2.8.10.2 Type of forest / woodland uses**

|                                              |                       | problems / comments (eg cutting frequency) |
|----------------------------------------------|-----------------------|--------------------------------------------|
| selective felling of (semi-) natural forests | <input type="radio"/> | .....                                      |
| clear felling of (semi-)natural forests      | <input type="radio"/> | .....                                      |
| plantation forestry                          | <input type="radio"/> | .....                                      |
| shifting cultivation                         | <input type="radio"/> | .....                                      |
| other (specify) .....                        | <input type="radio"/> | .....                                      |
| other (specify) .....                        | <input type="radio"/> | .....                                      |

**Comments:** .....

**2.8.10.3 For what purpose do land users use forests and woodlands?**

|                                                     |                       |
|-----------------------------------------------------|-----------------------|
| timber                                              | <input type="radio"/> |
| fuelwood                                            | <input type="radio"/> |
| fruits and nuts                                     | <input type="radio"/> |
| grazing / browsing                                  | <input type="radio"/> |
| other forest products / uses (honey, medical, etc.) | <input type="radio"/> |
| nature conservation / protection                    | <input type="radio"/> |
| recreation / tourism                                | <input type="radio"/> |
| protection against natural hazards                  | <input type="radio"/> |
| other (specify) .....                               | <input type="radio"/> |

**2.8.10.4 Size of forest / woodland area per household**

|                 |                       | comments |
|-----------------|-----------------------|----------|
| < 0.5 ha        | <input type="radio"/> | .....    |
| 0.5-1 ha        | <input type="radio"/> | .....    |
| 1-2 ha          | <input type="radio"/> | .....    |
| 2-5 ha          | <input type="radio"/> | .....    |
| 5-15 ha         | <input type="radio"/> | .....    |
| 15-50 ha        | <input type="radio"/> | .....    |
| 50-100 ha       | <input type="radio"/> | .....    |
| 100-500 ha      | <input type="radio"/> | .....    |
| 500-1,000 ha    | <input type="radio"/> | .....    |
| 1,000-10,000 ha | <input type="radio"/> | .....    |
| > 10,000ha      | <input type="radio"/> | .....    |

*Size of forest / woodland: all forest area / woodland used per household, not just where Technology is applied*

*Provide **further relevant information** about the forest / woodlands (including trends in management, replanting etc.) in Annex 3.*

**2.8.11 For other land: under which of the following conditions is the Technology applied?**

*If Technology is not applied on other land, go to part 3*

**2.8.11.1 What are the types of other land and what are their major management constraints?**

|                                                                   |                       | specify | major constraints |
|-------------------------------------------------------------------|-----------------------|---------|-------------------|
| mines and extractive industries                                   | <input type="radio"/> | .....   | .....             |
| settlement / urban                                                | <input type="radio"/> | .....   | .....             |
| infrastructure network (roads, railways, pipe lines, power lines) | <input type="radio"/> | .....   | .....             |
| wastelands / deserts / glaciers / swamps                          | <input type="radio"/> | .....   | .....             |
| recreation                                                        | <input type="radio"/> | .....   | .....             |
| other (specify):                                                  |                       |         |                   |
| .....                                                             | <input type="radio"/> | .....   | .....             |
| .....                                                             | <input type="radio"/> | .....   | .....             |

*Definitions: page QT7*

*Provide **further relevant information** about other land (eg trends in use etc.) in Annex 3.*

# PART 3: ANALYSIS OF THE SLM TECHNOLOGY

Many criteria can be used for the analysis of land conservation. In Part 3 selected criteria are presented, but additional analysis could be done based on Part 2.

## 3.1 Impacts: benefits and disadvantages

### 3.1.1 Indicate the on-site benefits the Technology has shown. Tick and quantify / specify if possible.

*Negligible, little, medium and high are arbitrary terms. Negligible can mean „no significant benefit” or even a disadvantage. In case of a disadvantage provide details in 3.1.3 and 3.1.4.*

*Make use of the specify/remarks/comments column to show evidence and justify your selection as much as possible. 10% increase (eg of yield) might be judged as a great improvement, nevertheless tick the category little (5-20%), and use “specify / comments” to explain.*

*Only indicate quantity (before/after) if impacts are measured / based on surveys*

| Several answers possible                                     | negligible<br>(0-5%)     | little<br>(5-20%)        | medium<br>(20-50%)       | high<br>(>50%)           | quantify<br>(indicate<br>unit)<br>before<br>conserv. | quantify<br>(indicate<br>unit)<br>after<br>conserv. | specify / comments |
|--------------------------------------------------------------|--------------------------|--------------------------|--------------------------|--------------------------|------------------------------------------------------|-----------------------------------------------------|--------------------|
| <b>3.1.1.1 Production and socio-economic benefits</b>        |                          |                          |                          |                          |                                                      |                                                     |                    |
| increased crop yield                                         | <input type="checkbox"/> | <input type="checkbox"/> | <input type="checkbox"/> | <input type="checkbox"/> | .....                                                | .....                                               | .....              |
| increased fodder production                                  | <input type="checkbox"/> | <input type="checkbox"/> | <input type="checkbox"/> | <input type="checkbox"/> | .....                                                | .....                                               | .....              |
| increased fodder quality                                     | <input type="checkbox"/> | <input type="checkbox"/> | <input type="checkbox"/> | <input type="checkbox"/> | .....                                                | .....                                               | .....              |
| increased animal production                                  | <input type="checkbox"/> | <input type="checkbox"/> | <input type="checkbox"/> | <input type="checkbox"/> | .....                                                | .....                                               | .....              |
| increased wood production                                    | <input type="checkbox"/> | <input type="checkbox"/> | <input type="checkbox"/> | <input type="checkbox"/> | .....                                                | .....                                               | .....              |
| reduced risk of production failure                           | <input type="checkbox"/> | <input type="checkbox"/> | <input type="checkbox"/> | <input type="checkbox"/> | .....                                                | .....                                               | .....              |
| increased drinking / household water availability / quality  | <input type="checkbox"/> | <input type="checkbox"/> | <input type="checkbox"/> | <input type="checkbox"/> | .....                                                | .....                                               | .....              |
| increased water availability / quality for livestock         | <input type="checkbox"/> | <input type="checkbox"/> | <input type="checkbox"/> | <input type="checkbox"/> | .....                                                | .....                                               | .....              |
| increased irrigation water availability / quality            | <input type="checkbox"/> | <input type="checkbox"/> | <input type="checkbox"/> | <input type="checkbox"/> | .....                                                | .....                                               | .....              |
| reduced demand for irrigation water                          | <input type="checkbox"/> | <input type="checkbox"/> | <input type="checkbox"/> | <input type="checkbox"/> | .....                                                | .....                                               | .....              |
| reduced expenses on agricultural inputs                      | <input type="checkbox"/> | <input type="checkbox"/> | <input type="checkbox"/> | <input type="checkbox"/> | .....                                                | .....                                               | .....              |
| increased farm income                                        | <input type="checkbox"/> | <input type="checkbox"/> | <input type="checkbox"/> | <input type="checkbox"/> | .....                                                | .....                                               | .....              |
| diversification of income sources                            | <input type="checkbox"/> | <input type="checkbox"/> | <input type="checkbox"/> | <input type="checkbox"/> | .....                                                | .....                                               | .....              |
| increased production area (new land under cultivation / use) | <input type="checkbox"/> | <input type="checkbox"/> | <input type="checkbox"/> | <input type="checkbox"/> | .....                                                | .....                                               | .....              |
| decreased labour constraints                                 | <input type="checkbox"/> | <input type="checkbox"/> | <input type="checkbox"/> | <input type="checkbox"/> | .....                                                | .....                                               | .....              |
| decreased workload                                           | <input type="checkbox"/> | <input type="checkbox"/> | <input type="checkbox"/> | <input type="checkbox"/> | .....                                                | .....                                               | .....              |
| simplified farm operations                                   | <input type="checkbox"/> | <input type="checkbox"/> | <input type="checkbox"/> | <input type="checkbox"/> | .....                                                | .....                                               | .....              |
| increased product diversification                            | <input type="checkbox"/> | <input type="checkbox"/> | <input type="checkbox"/> | <input type="checkbox"/> | .....                                                | .....                                               | .....              |
| others (specify):                                            | <input type="checkbox"/> | <input type="checkbox"/> | <input type="checkbox"/> | <input type="checkbox"/> | .....                                                | .....                                               | .....              |
| .....                                                        | <input type="checkbox"/> | <input type="checkbox"/> | <input type="checkbox"/> | <input type="checkbox"/> | .....                                                | .....                                               | .....              |
| .....                                                        | <input type="checkbox"/> | <input type="checkbox"/> | <input type="checkbox"/> | <input type="checkbox"/> | .....                                                | .....                                               | .....              |
| .....                                                        | <input type="checkbox"/> | <input type="checkbox"/> | <input type="checkbox"/> | <input type="checkbox"/> | .....                                                | .....                                               | .....              |



**Square boxes must be ticked!** If 'Several answers possible' is not indicated tick only one box!  
**Make use of the specify/remark/comments column or line as much as possible!**

| <i>Several answers possible</i>                                                                           | negligible<br>(0-5%)     | little<br>(5-20%)        | medium<br>(20-50%)       | high<br>(>50%)           | quantify<br>(indicate<br>unit)<br><b>before<br/>conserv.</b> | quantify<br>(indicate<br>unit)<br><b>after<br/>conserva.</b> | specify / comments |
|-----------------------------------------------------------------------------------------------------------|--------------------------|--------------------------|--------------------------|--------------------------|--------------------------------------------------------------|--------------------------------------------------------------|--------------------|
| <b>3.1.1.2 Socio-cultural benefits</b>                                                                    |                          |                          |                          |                          |                                                              |                                                              |                    |
| improved cultural opportunities (eg spiritual, aesthetic, others)                                         | <input type="checkbox"/> | <input type="checkbox"/> | <input type="checkbox"/> | <input type="checkbox"/> | .....                                                        | .....                                                        | .....              |
| increased recreational opportunities                                                                      | <input type="checkbox"/> | <input type="checkbox"/> | <input type="checkbox"/> | <input type="checkbox"/> | .....                                                        | .....                                                        | .....              |
| community institution strengthening                                                                       | <input type="checkbox"/> | <input type="checkbox"/> | <input type="checkbox"/> | <input type="checkbox"/> | .....                                                        | .....                                                        | .....              |
| national institution strengthening                                                                        | <input type="checkbox"/> | <input type="checkbox"/> | <input type="checkbox"/> | <input type="checkbox"/> | .....                                                        | .....                                                        | .....              |
| improved conservation / erosion knowledge                                                                 | <input type="checkbox"/> | <input type="checkbox"/> | <input type="checkbox"/> | <input type="checkbox"/> | .....                                                        | .....                                                        | .....              |
| conflict mitigation                                                                                       | <input type="checkbox"/> | <input type="checkbox"/> | <input type="checkbox"/> | <input type="checkbox"/> | .....                                                        | .....                                                        | .....              |
| improved situation of socially and economically disadvantaged groups (gender, age, status, ethnicity etc) | <input type="checkbox"/> | <input type="checkbox"/> | <input type="checkbox"/> | <input type="checkbox"/> | .....                                                        | .....                                                        | .....              |
| improved food security / self-sufficiency (reduced dependence on ext. support)                            | <input type="checkbox"/> | <input type="checkbox"/> | <input type="checkbox"/> | <input type="checkbox"/> | .....                                                        | .....                                                        | .....              |
| improved health                                                                                           | <input type="checkbox"/> | <input type="checkbox"/> | <input type="checkbox"/> | <input type="checkbox"/> | .....                                                        | .....                                                        | .....              |
| others (specify):                                                                                         | <input type="checkbox"/> | <input type="checkbox"/> | <input type="checkbox"/> | <input type="checkbox"/> | .....                                                        | .....                                                        | .....              |
| .....                                                                                                     | <input type="checkbox"/> | <input type="checkbox"/> | <input type="checkbox"/> | <input type="checkbox"/> | .....                                                        | .....                                                        | .....              |
| .....                                                                                                     | <input type="checkbox"/> | <input type="checkbox"/> | <input type="checkbox"/> | <input type="checkbox"/> | .....                                                        | .....                                                        | .....              |
| .....                                                                                                     | <input type="checkbox"/> | <input type="checkbox"/> | <input type="checkbox"/> | <input type="checkbox"/> | .....                                                        | .....                                                        | .....              |
| <b>3.1.1.3 Ecological benefits</b>                                                                        |                          |                          |                          |                          |                                                              |                                                              |                    |
| increased water quantity                                                                                  | <input type="checkbox"/> | <input type="checkbox"/> | <input type="checkbox"/> | <input type="checkbox"/> | .....                                                        | .....                                                        | .....              |
| increased water quality                                                                                   | <input type="checkbox"/> | <input type="checkbox"/> | <input type="checkbox"/> | <input type="checkbox"/> | .....                                                        | .....                                                        | .....              |
| improved harvesting / collection of water (runoff, dew, snow, etc)                                        | <input type="checkbox"/> | <input type="checkbox"/> | <input type="checkbox"/> | <input type="checkbox"/> | .....                                                        | .....                                                        | .....              |
| increased soil moisture                                                                                   | <input type="checkbox"/> | <input type="checkbox"/> | <input type="checkbox"/> | <input type="checkbox"/> | .....                                                        | .....                                                        | .....              |
| reduced evaporation                                                                                       | <input type="checkbox"/> | <input type="checkbox"/> | <input type="checkbox"/> | <input type="checkbox"/> | .....                                                        | .....                                                        | .....              |
| reduced surface runoff                                                                                    | <input type="checkbox"/> | <input type="checkbox"/> | <input type="checkbox"/> | <input type="checkbox"/> | .....                                                        | .....                                                        | .....              |
| improved excess water drainage                                                                            | <input type="checkbox"/> | <input type="checkbox"/> | <input type="checkbox"/> | <input type="checkbox"/> | .....                                                        | .....                                                        | .....              |
| recharge of groundwater table/aquifer                                                                     | <input type="checkbox"/> | <input type="checkbox"/> | <input type="checkbox"/> | <input type="checkbox"/> | .....                                                        | .....                                                        | .....              |
| reduced hazard towards adverse events (drought, floods, storms, ...)                                      | <input type="checkbox"/> | <input type="checkbox"/> | <input type="checkbox"/> | <input type="checkbox"/> | .....                                                        | .....                                                        | .....              |
| reduced wind velocity                                                                                     | <input type="checkbox"/> | <input type="checkbox"/> | <input type="checkbox"/> | <input type="checkbox"/> | .....                                                        | .....                                                        | .....              |
| improved soil cover                                                                                       | <input type="checkbox"/> | <input type="checkbox"/> | <input type="checkbox"/> | <input type="checkbox"/> | .....                                                        | .....                                                        | .....              |
| increased biomass / above ground C                                                                        | <input type="checkbox"/> | <input type="checkbox"/> | <input type="checkbox"/> | <input type="checkbox"/> | .....                                                        | .....                                                        | .....              |
| increased nutrient cycling / recharge                                                                     | <input type="checkbox"/> | <input type="checkbox"/> | <input type="checkbox"/> | <input type="checkbox"/> | .....                                                        | .....                                                        | .....              |
| increased soil organic matter / below ground C                                                            | <input type="checkbox"/> | <input type="checkbox"/> | <input type="checkbox"/> | <input type="checkbox"/> | .....                                                        | .....                                                        | .....              |
| reduced emission of carbon and greenhouse gases                                                           | <input type="checkbox"/> | <input type="checkbox"/> | <input type="checkbox"/> | <input type="checkbox"/> | .....                                                        | .....                                                        | .....              |
| reduced soil loss                                                                                         | <input type="checkbox"/> | <input type="checkbox"/> | <input type="checkbox"/> | <input type="checkbox"/> | .....                                                        | .....                                                        | .....              |

|                                                                      |                          |                          |                          |                          |       |       |       |
|----------------------------------------------------------------------|--------------------------|--------------------------|--------------------------|--------------------------|-------|-------|-------|
| reduced soil crusting/sealing                                        | <input type="checkbox"/> | <input type="checkbox"/> | <input type="checkbox"/> | <input type="checkbox"/> | ..... | ..... | ..... |
| reduced soil compaction                                              | <input type="checkbox"/> | <input type="checkbox"/> | <input type="checkbox"/> | <input type="checkbox"/> | ..... | ..... | ..... |
| reduced salinity                                                     | <input type="checkbox"/> | <input type="checkbox"/> | <input type="checkbox"/> | <input type="checkbox"/> | ..... | ..... | ..... |
| reduced fire risk                                                    | <input type="checkbox"/> | <input type="checkbox"/> | <input type="checkbox"/> | <input type="checkbox"/> | ..... | ..... | ..... |
| increased animal diversity                                           | <input type="checkbox"/> | <input type="checkbox"/> | <input type="checkbox"/> | <input type="checkbox"/> | ..... | ..... | ..... |
| increased plant diversity                                            | <input type="checkbox"/> | <input type="checkbox"/> | <input type="checkbox"/> | <input type="checkbox"/> | ..... | ..... | ..... |
| reduced invasive alien species                                       | <input type="checkbox"/> | <input type="checkbox"/> | <input type="checkbox"/> | <input type="checkbox"/> | ..... | ..... | ..... |
| increased beneficial species<br>(predators, earthworms, pollinators) | <input type="checkbox"/> | <input type="checkbox"/> | <input type="checkbox"/> | <input type="checkbox"/> | ..... | ..... | ..... |
| increased biological pest / disease<br>control                       | <input type="checkbox"/> | <input type="checkbox"/> | <input type="checkbox"/> | <input type="checkbox"/> | ..... | ..... | ..... |
| increased / maintained habitat<br>diversity                          | <input type="checkbox"/> | <input type="checkbox"/> | <input type="checkbox"/> | <input type="checkbox"/> | ..... | ..... | ..... |
| others (specify):                                                    | <input type="checkbox"/> | <input type="checkbox"/> | <input type="checkbox"/> | <input type="checkbox"/> | ..... | ..... | ..... |
| .....                                                                | <input type="checkbox"/> | <input type="checkbox"/> | <input type="checkbox"/> | <input type="checkbox"/> | ..... | ..... | ..... |
| .....                                                                | <input type="checkbox"/> | <input type="checkbox"/> | <input type="checkbox"/> | <input type="checkbox"/> | ..... | ..... | ..... |
| .....                                                                | <input type="checkbox"/> | <input type="checkbox"/> | <input type="checkbox"/> | <input type="checkbox"/> | ..... | ..... | ..... |
| <b>3.1.1.4 Other benefits (specify):</b>                             |                          |                          |                          |                          |       |       |       |
| energy generation (eg hydro, bio)                                    | <input type="checkbox"/> | <input type="checkbox"/> | <input type="checkbox"/> | <input type="checkbox"/> | ..... | ..... | ..... |
| others (specify):                                                    | <input type="checkbox"/> | <input type="checkbox"/> | <input type="checkbox"/> | <input type="checkbox"/> | ..... | ..... | ..... |
| .....                                                                | <input type="checkbox"/> | <input type="checkbox"/> | <input type="checkbox"/> | <input type="checkbox"/> | ..... | ..... | ..... |
| .....                                                                | <input type="checkbox"/> | <input type="checkbox"/> | <input type="checkbox"/> | <input type="checkbox"/> | ..... | ..... | ..... |

**3.1.2 Indicate off-site benefits (if any). Tick and quantify / specify if possible.**

Several answers possible

**On-site:** concerns the actual area where the SLM Technology is applied.

**Off-site:** concerns the adjacent area or areas further away from the area where the SLM Technology is applied.

| Several answers possible                                                      | negligible<br>(0-5%)     | little<br>(5-20%)        | medium<br>(20-50%)       | high<br>(>50%)           | quantify<br>(indicate<br>unit)<br>before<br>conserv. | quantify<br>(indicate<br>unit)<br>after<br>conserv. | specify / comments |
|-------------------------------------------------------------------------------|--------------------------|--------------------------|--------------------------|--------------------------|------------------------------------------------------|-----------------------------------------------------|--------------------|
| increased water availability<br>(groundwater, springs)                        | <input type="checkbox"/> | <input type="checkbox"/> | <input type="checkbox"/> | <input type="checkbox"/> | .....                                                | .....                                               | .....              |
| reduced downstream flooding                                                   | <input type="checkbox"/> | <input type="checkbox"/> | <input type="checkbox"/> | <input type="checkbox"/> | .....                                                | .....                                               | .....              |
| increased stream flow in dry season<br>/ reliable and stable low flows        | <input type="checkbox"/> | <input type="checkbox"/> | <input type="checkbox"/> | <input type="checkbox"/> | .....                                                | .....                                               | .....              |
| reduced downstream siltation                                                  | <input type="checkbox"/> | <input type="checkbox"/> | <input type="checkbox"/> | <input type="checkbox"/> | .....                                                | .....                                               | .....              |
| reduced groundwater / river<br>pollution                                      | <input type="checkbox"/> | <input type="checkbox"/> | <input type="checkbox"/> | <input type="checkbox"/> | .....                                                | .....                                               | .....              |
| improved buffering / filtering<br>capacity (by soil, vegetation,<br>wetlands) | <input type="checkbox"/> | <input type="checkbox"/> | <input type="checkbox"/> | <input type="checkbox"/> | .....                                                | .....                                               | .....              |
| reduced wind transported sediments                                            | <input type="checkbox"/> | <input type="checkbox"/> | <input type="checkbox"/> | <input type="checkbox"/> | .....                                                | .....                                               | .....              |
| reduced damage on neighbours' fields                                          | <input type="checkbox"/> | <input type="checkbox"/> | <input type="checkbox"/> | <input type="checkbox"/> | .....                                                | .....                                               | .....              |
| reduced damage on public/ private<br>infrastructure                           | <input type="checkbox"/> | <input type="checkbox"/> | <input type="checkbox"/> | <input type="checkbox"/> | .....                                                | .....                                               | .....              |
| others (specify):                                                             | <input type="checkbox"/> | <input type="checkbox"/> | <input type="checkbox"/> | <input type="checkbox"/> | .....                                                | .....                                               | .....              |
| .....                                                                         | <input type="checkbox"/> | <input type="checkbox"/> | <input type="checkbox"/> | <input type="checkbox"/> | .....                                                | .....                                               | .....              |

|       |                          |                          |                          |                          |       |       |       |
|-------|--------------------------|--------------------------|--------------------------|--------------------------|-------|-------|-------|
| ..... | <input type="checkbox"/> | <input type="checkbox"/> | <input type="checkbox"/> | <input type="checkbox"/> | ..... | ..... | ..... |
| ..... | <input type="checkbox"/> | <input type="checkbox"/> | <input type="checkbox"/> | <input type="checkbox"/> | ..... | ..... | ..... |

**3.1.3 Indicate the on-site disadvantages the Technology has shown. Tick and quantify / specify if possible.**

*Several answers possible*

|  | negligible<br>(0-5%) | little<br>(5-20%) | medium<br>(20-50%) | high<br>(>50%) | quantify<br>(indicate<br>unit)<br><b>before<br/>conserv.</b> | quantify<br>(indicate<br>unit)<br><b>after<br/>conserv.</b> | specify / comments |
|--|----------------------|-------------------|--------------------|----------------|--------------------------------------------------------------|-------------------------------------------------------------|--------------------|
|--|----------------------|-------------------|--------------------|----------------|--------------------------------------------------------------|-------------------------------------------------------------|--------------------|

**3.1.3.1 Production and socio-economic disadvantages**

|                                                   |                          |                          |                          |                          |       |       |       |
|---------------------------------------------------|--------------------------|--------------------------|--------------------------|--------------------------|-------|-------|-------|
| reduced crop production                           | <input type="checkbox"/> | <input type="checkbox"/> | <input type="checkbox"/> | <input type="checkbox"/> | ..... | ..... | ..... |
| reduced fodder production                         | <input type="checkbox"/> | <input type="checkbox"/> | <input type="checkbox"/> | <input type="checkbox"/> | ..... | ..... | ..... |
| reduced fodder quality                            | <input type="checkbox"/> | <input type="checkbox"/> | <input type="checkbox"/> | <input type="checkbox"/> | ..... | ..... | ..... |
| reduced animal production                         | <input type="checkbox"/> | <input type="checkbox"/> | <input type="checkbox"/> | <input type="checkbox"/> | ..... | ..... | ..... |
| reduced wood production                           | <input type="checkbox"/> | <input type="checkbox"/> | <input type="checkbox"/> | <input type="checkbox"/> | ..... | ..... | ..... |
| increased risk of crop failure                    | <input type="checkbox"/> | <input type="checkbox"/> | <input type="checkbox"/> | <input type="checkbox"/> | ..... | ..... | ..... |
| decreased drinking water availability / quality   | <input type="checkbox"/> | <input type="checkbox"/> | <input type="checkbox"/> | <input type="checkbox"/> | ..... | ..... | ..... |
| decreased irrigation water availability / quality | <input type="checkbox"/> | <input type="checkbox"/> | <input type="checkbox"/> | <input type="checkbox"/> | ..... | ..... | ..... |
| increased demand for irrigation water             | <input type="checkbox"/> | <input type="checkbox"/> | <input type="checkbox"/> | <input type="checkbox"/> | ..... | ..... | ..... |
| increased expenses on agricultural inputs         | <input type="checkbox"/> | <input type="checkbox"/> | <input type="checkbox"/> | <input type="checkbox"/> | ..... | ..... | ..... |
| decreased farm income                             | <input type="checkbox"/> | <input type="checkbox"/> | <input type="checkbox"/> | <input type="checkbox"/> | ..... | ..... | ..... |
| increased economic inequity                       | <input type="checkbox"/> | <input type="checkbox"/> | <input type="checkbox"/> | <input type="checkbox"/> | ..... | ..... | ..... |
| loss of land (decreased production area)          | <input type="checkbox"/> | <input type="checkbox"/> | <input type="checkbox"/> | <input type="checkbox"/> | ..... | ..... | ..... |
| increased labour constraints                      | <input type="checkbox"/> | <input type="checkbox"/> | <input type="checkbox"/> | <input type="checkbox"/> | ..... | ..... | ..... |
| reduced product diversification                   | <input type="checkbox"/> | <input type="checkbox"/> | <input type="checkbox"/> | <input type="checkbox"/> | ..... | ..... | ..... |
| hindered farm operations                          | <input type="checkbox"/> | <input type="checkbox"/> | <input type="checkbox"/> | <input type="checkbox"/> | ..... | ..... | ..... |
| others (specify):                                 | <input type="checkbox"/> | <input type="checkbox"/> | <input type="checkbox"/> | <input type="checkbox"/> | ..... | ..... | ..... |
| .....                                             | <input type="checkbox"/> | <input type="checkbox"/> | <input type="checkbox"/> | <input type="checkbox"/> | ..... | ..... | ..... |
| .....                                             | <input type="checkbox"/> | <input type="checkbox"/> | <input type="checkbox"/> | <input type="checkbox"/> | ..... | ..... | ..... |

| <i>Several answers possible</i>                                                                          | <b>negligible<br/>(0-5%)</b> | <b>little<br/>(5-20%)</b> | <b>medium<br/>(20-50%)</b> | <b>high<br/>(&gt;50%)</b> | <b>quantify<br/>(indicate<br/>unit)<br/>before<br/>conserv.</b> | <b>quantify<br/>(indicate<br/>unit)<br/>after<br/>conserv.</b> | <b>specify / comments</b> |
|----------------------------------------------------------------------------------------------------------|------------------------------|---------------------------|----------------------------|---------------------------|-----------------------------------------------------------------|----------------------------------------------------------------|---------------------------|
| <b>3.1.3.2 Socio-cultural disadvantages</b>                                                              |                              |                           |                            |                           |                                                                 |                                                                |                           |
| loss of cultural opportunities                                                                           | <input type="checkbox"/>     | <input type="checkbox"/>  | <input type="checkbox"/>   | <input type="checkbox"/>  | .....                                                           | .....                                                          | .....                     |
| loss of recreational opportunities                                                                       | <input type="checkbox"/>     | <input type="checkbox"/>  | <input type="checkbox"/>   | <input type="checkbox"/>  | .....                                                           | .....                                                          | .....                     |
| socio-cultural conflicts                                                                                 | <input type="checkbox"/>     | <input type="checkbox"/>  | <input type="checkbox"/>   | <input type="checkbox"/>  | .....                                                           | .....                                                          | .....                     |
| worsen situation of socially and economically disadvantaged groups (gender, age, status, ethnicity etc). | <input type="checkbox"/>     | <input type="checkbox"/>  | <input type="checkbox"/>   | <input type="checkbox"/>  | .....                                                           | .....                                                          | .....                     |
| decreased food security/self-sufficiency                                                                 | <input type="checkbox"/>     | <input type="checkbox"/>  | <input type="checkbox"/>   | <input type="checkbox"/>  | .....                                                           | .....                                                          | .....                     |
| increased health problems                                                                                | <input type="checkbox"/>     | <input type="checkbox"/>  | <input type="checkbox"/>   | <input type="checkbox"/>  | .....                                                           | .....                                                          | .....                     |
| others (specify):                                                                                        | <input type="checkbox"/>     | <input type="checkbox"/>  | <input type="checkbox"/>   | <input type="checkbox"/>  | .....                                                           | .....                                                          | .....                     |
| .....                                                                                                    | <input type="checkbox"/>     | <input type="checkbox"/>  | <input type="checkbox"/>   | <input type="checkbox"/>  | .....                                                           | .....                                                          | .....                     |
| .....                                                                                                    | <input type="checkbox"/>     | <input type="checkbox"/>  | <input type="checkbox"/>   | <input type="checkbox"/>  | .....                                                           | .....                                                          | .....                     |
| .....                                                                                                    | <input type="checkbox"/>     | <input type="checkbox"/>  | <input type="checkbox"/>   | <input type="checkbox"/>  | .....                                                           | .....                                                          | .....                     |
| <b>3.1.3.3 Ecological disadvantages</b>                                                                  |                              |                           |                            |                           |                                                                 |                                                                |                           |
| decreased water quantity                                                                                 | <input type="checkbox"/>     | <input type="checkbox"/>  | <input type="checkbox"/>   | <input type="checkbox"/>  | .....                                                           | .....                                                          | .....                     |
| decreased water quality                                                                                  | <input type="checkbox"/>     | <input type="checkbox"/>  | <input type="checkbox"/>   | <input type="checkbox"/>  | .....                                                           | .....                                                          | .....                     |
| decreased soil moisture                                                                                  | <input type="checkbox"/>     | <input type="checkbox"/>  | <input type="checkbox"/>   | <input type="checkbox"/>  | .....                                                           | .....                                                          | .....                     |
| increased evaporation                                                                                    | <input type="checkbox"/>     | <input type="checkbox"/>  | <input type="checkbox"/>   | <input type="checkbox"/>  | .....                                                           | .....                                                          | .....                     |
| increased surface water runoff                                                                           | <input type="checkbox"/>     | <input type="checkbox"/>  | <input type="checkbox"/>   | <input type="checkbox"/>  | .....                                                           | .....                                                          | .....                     |
| waterlogging                                                                                             | <input type="checkbox"/>     | <input type="checkbox"/>  | <input type="checkbox"/>   | <input type="checkbox"/>  | .....                                                           | .....                                                          | .....                     |
| lowering of ground water table                                                                           | <input type="checkbox"/>     | <input type="checkbox"/>  | <input type="checkbox"/>   | <input type="checkbox"/>  | .....                                                           | .....                                                          | .....                     |
| decreased soil cover                                                                                     | <input type="checkbox"/>     | <input type="checkbox"/>  | <input type="checkbox"/>   | <input type="checkbox"/>  | .....                                                           | .....                                                          | .....                     |
| increased wind velocity                                                                                  | <input type="checkbox"/>     | <input type="checkbox"/>  | <input type="checkbox"/>   | <input type="checkbox"/>  | .....                                                           | .....                                                          | .....                     |
| decreased soil organic matter                                                                            | <input type="checkbox"/>     | <input type="checkbox"/>  | <input type="checkbox"/>   | <input type="checkbox"/>  | .....                                                           | .....                                                          | .....                     |
| increased soil sealing / compaction                                                                      | <input type="checkbox"/>     | <input type="checkbox"/>  | <input type="checkbox"/>   | <input type="checkbox"/>  | .....                                                           | .....                                                          | .....                     |
| increased salinity                                                                                       | <input type="checkbox"/>     | <input type="checkbox"/>  | <input type="checkbox"/>   | <input type="checkbox"/>  | .....                                                           | .....                                                          | .....                     |
| increased fire risk                                                                                      | <input type="checkbox"/>     | <input type="checkbox"/>  | <input type="checkbox"/>   | <input type="checkbox"/>  | .....                                                           | .....                                                          | .....                     |
| increased competition (water, sunlight, nutrients)                                                       | <input type="checkbox"/>     | <input type="checkbox"/>  | <input type="checkbox"/>   | <input type="checkbox"/>  | .....                                                           | .....                                                          | .....                     |
| increased soil erosion (locally)                                                                         | <input type="checkbox"/>     | <input type="checkbox"/>  | <input type="checkbox"/>   | <input type="checkbox"/>  | .....                                                           | .....                                                          | .....                     |
| reduced biodiversity / crop diversity                                                                    | <input type="checkbox"/>     | <input type="checkbox"/>  | <input type="checkbox"/>   | <input type="checkbox"/>  | .....                                                           | .....                                                          | .....                     |
| increased habitat fragmentation                                                                          | <input type="checkbox"/>     | <input type="checkbox"/>  | <input type="checkbox"/>   | <input type="checkbox"/>  | .....                                                           | .....                                                          | .....                     |
| increased niches for pests (birds, slugs, rodents, etc.)                                                 | <input type="checkbox"/>     | <input type="checkbox"/>  | <input type="checkbox"/>   | <input type="checkbox"/>  | .....                                                           | .....                                                          | .....                     |
| others (specify):                                                                                        | <input type="checkbox"/>     | <input type="checkbox"/>  | <input type="checkbox"/>   | <input type="checkbox"/>  | .....                                                           | .....                                                          | .....                     |
| .....                                                                                                    | <input type="checkbox"/>     | <input type="checkbox"/>  | <input type="checkbox"/>   | <input type="checkbox"/>  | .....                                                           | .....                                                          | .....                     |
| .....                                                                                                    | <input type="checkbox"/>     | <input type="checkbox"/>  | <input type="checkbox"/>   | <input type="checkbox"/>  | .....                                                           | .....                                                          | .....                     |
| .....                                                                                                    | <input type="checkbox"/>     | <input type="checkbox"/>  | <input type="checkbox"/>   | <input type="checkbox"/>  | .....                                                           | .....                                                          | .....                     |

**3.1.3.4 Other disadvantages (specify):**

|       |                          |                          |                          |                          |       |       |       |
|-------|--------------------------|--------------------------|--------------------------|--------------------------|-------|-------|-------|
| ..... | <input type="checkbox"/> | <input type="checkbox"/> | <input type="checkbox"/> | <input type="checkbox"/> | ..... | ..... | ..... |
| ..... | <input type="checkbox"/> | <input type="checkbox"/> | <input type="checkbox"/> | <input type="checkbox"/> | ..... | ..... | ..... |
| ..... | <input type="checkbox"/> | <input type="checkbox"/> | <input type="checkbox"/> | <input type="checkbox"/> | ..... | ..... | ..... |
| ..... | <input type="checkbox"/> | <input type="checkbox"/> | <input type="checkbox"/> | <input type="checkbox"/> | ..... | ..... | ..... |

**3.1.4 Indicate off-site disadvantages (if any). Tick and quantify / specify if possible.**

*Several answers possible*

|                                                                             | negligible<br>(0-5%)     | little<br>(5-20%)        | medium<br>(20-50%)       | high<br>(>50%)           | quantify<br>(indicate<br>unit)<br>before<br>conserv. | quantify<br>(indicate<br>unit)<br>after<br>conserv. | specify / comments |
|-----------------------------------------------------------------------------|--------------------------|--------------------------|--------------------------|--------------------------|------------------------------------------------------|-----------------------------------------------------|--------------------|
| increased downstream flooding                                               | <input type="checkbox"/> | <input type="checkbox"/> | <input type="checkbox"/> | <input type="checkbox"/> | .....                                                | .....                                               | .....              |
| reduced river flows                                                         | <input type="checkbox"/> | <input type="checkbox"/> | <input type="checkbox"/> | <input type="checkbox"/> | .....                                                | .....                                               | .....              |
| reduced sediment yields                                                     | <input type="checkbox"/> | <input type="checkbox"/> | <input type="checkbox"/> | <input type="checkbox"/> | .....                                                | .....                                               | .....              |
| increased groundwater / river<br>pollution                                  | <input type="checkbox"/> | <input type="checkbox"/> | <input type="checkbox"/> | <input type="checkbox"/> | .....                                                | .....                                               | .....              |
| decreased buffering / filtering capacity<br>(by soil, vegetation, wetlands) | <input type="checkbox"/> | <input type="checkbox"/> | <input type="checkbox"/> | <input type="checkbox"/> | .....                                                | .....                                               | .....              |
| increased damage on neighbours'<br>fields                                   | <input type="checkbox"/> | <input type="checkbox"/> | <input type="checkbox"/> | <input type="checkbox"/> | .....                                                | .....                                               | .....              |
| increased damage on public/ private<br>infrastructure                       | <input type="checkbox"/> | <input type="checkbox"/> | <input type="checkbox"/> | <input type="checkbox"/> | .....                                                | .....                                               | .....              |
| others (specify):                                                           | <input type="checkbox"/> | <input type="checkbox"/> | <input type="checkbox"/> | <input type="checkbox"/> | .....                                                | .....                                               | .....              |
| .....                                                                       | <input type="checkbox"/> | <input type="checkbox"/> | <input type="checkbox"/> | <input type="checkbox"/> | .....                                                | .....                                               | .....              |
| .....                                                                       | <input type="checkbox"/> | <input type="checkbox"/> | <input type="checkbox"/> | <input type="checkbox"/> | .....                                                | .....                                               | .....              |
| .....                                                                       | <input type="checkbox"/> | <input type="checkbox"/> | <input type="checkbox"/> | <input type="checkbox"/> | .....                                                | .....                                               | .....              |
| .....                                                                       | <input type="checkbox"/> | <input type="checkbox"/> | <input type="checkbox"/> | <input type="checkbox"/> | .....                                                | .....                                               | .....              |

**3.1.5 Has the Technology contributed to improve livelihoods and human well-being (eg education, health)?**

no       yes, little       yes, moderately       yes, greatly

Specify / comments: .....

.....

### 3.2 Economic analysis

#### 3.2.1 How do the benefits compare with the establishment costs (from land users' perspective!)?

|                     | very negative            | negative                 | slightly negative        | neutral / balanced       | slightly positive        | positive                 | very positive            |
|---------------------|--------------------------|--------------------------|--------------------------|--------------------------|--------------------------|--------------------------|--------------------------|
| short-term returns: | <input type="checkbox"/> |
| long-term returns:  | <input type="checkbox"/> |

#### 3.2.2 How do the benefits compare with the maintenance / recurrent costs (from land users' perspective!)?

|                     | very negative            | negative                 | slightly negative        | neutral / balanced       | slightly positive        | positive                 | very positive            |
|---------------------|--------------------------|--------------------------|--------------------------|--------------------------|--------------------------|--------------------------|--------------------------|
| short-term returns: | <input type="checkbox"/> |
| long-term returns:  | <input type="checkbox"/> |

**Short term:** 1 - 3 years; **long term:** 10 year

Specify / comments: .....

.....

### 3.3 Acceptance or adoption

We differentiate between **acceptance with external material support** and **spontaneous adoption** (the voluntary adoption of a Technology without external material support). If no external support was provided, go to 3.3.2. **Technical guidance** is not considered as external material support.

**External material support:** In this context external material support also includes financial support from government or private organisations.

#### 3.3.1 Acceptance with external material support

If no external material support were used, go to 3.3.2.

##### 3.3.1.1 How many land users who have implemented the Technology have done it with external material support (eg food-for-work, payment, subsidised machinery)?

- ..... % of land user families that have applied the SLM Technology\*
- ..... number of land user families
- ..... % of area stated in 1.3.1\*

Specify / comments: .....

.....

.....

\* Note: together with 3.3.2.1 this has to add up to 100%, as only those land users who have implemented the Technology are considered

**3.3.2 Spontaneous adoption**

We define *spontaneous adoption* as the voluntary implementation of a Technology without external material support other than technical guidance.

**3.3.2.1 How many land users who have implemented the Technology have done it wholly voluntarily, without any external material support?**

- ..... % of land user families that have applied the SLM Technology\*
- ..... number of land user families
- ..... % of area stated in 1.3.1\*

Specify / comments: .....

*\* Note: together with 3.3.1.1 this has to add up to 100%, as only those land users who have implemented the Technology are considered*

**3.3.2.2 Adoption trend**

Is there a trend towards (growing) spontaneous adoption of the Technology?

no       yes, little       yes, moderate       yes, strong

Comments: .....

### 3.4 Concluding statements

#### 3.4.1 List the major strengths / advantages of the Technology and how they can be sustained / enhanced.

Give a concluding statement about the Technology.

| Strengths / advantages  | How can they be sustained / enhanced? |
|-------------------------|---------------------------------------|
| in your opinion         |                                       |
| 1) .....                | .....                                 |
| 2) .....                | .....                                 |
| 3) .....                | .....                                 |
| 4) .....                | .....                                 |
| 5) .....                | .....                                 |
| in the land users' view |                                       |
| 1) .....                | .....                                 |
| 2) .....                | .....                                 |
| 3) .....                | .....                                 |
| 4) .....                | .....                                 |
| 5) .....                | .....                                 |



**3.4.2 List the major weaknesses / disadvantages of the Technology and how they can be overcome.**

| Weaknesses / disadvantages | How can they be overcome? |
|----------------------------|---------------------------|
| in your opinion            |                           |
| 1) .....                   | .....                     |
| 2) .....                   | .....                     |
| 3) .....                   | .....                     |
| 4) .....                   | .....                     |
| 5) .....                   | .....                     |
| in the land users' view    |                           |
| 1) .....                   | .....                     |
| 2) .....                   | .....                     |
| 3) .....                   | .....                     |
| 4) .....                   | .....                     |
| 5) .....                   | .....                     |









## Annex 4

### Causes of degradation

#### Direct causes (human induced)

**Soil management:** improper soil management. This includes cultivation of unsuitable soils, missing or insufficient soil conservation measures, use of heavy machinery, tillage practices (ploughing, harrowing, etc.), etc.

**Crop management:** improper management of annual, perennial (eg grass), shrub and tree crops. This includes a wide variety of practices, such as missing reduction of plant cover and residues, inappropriate application of fertilizer / manure etc, nutrient mining, shortening of the fallow period in shifting cultivation, inappropriate irrigation, inappropriate use of water in rainfed agriculture, etc.

**Deforestation and removal of natural vegetation:** extensive removal of natural vegetation (usually primary or secondary forest), due to large-scale commercial forestry, urban development, conversion to other land uses (agriculture, industry), road construction, forest fires, etc. Deforestation is often followed by agricultural activities that may cause further degradation (see "crop management").

**Over-exploitation of vegetation for domestic use:** in contrast to "deforestation and removal of natural vegetation", this causative factor does not necessarily involve the (nearly) complete removal of "natural" vegetation, but rather degeneration of the remaining vegetation, thus leading to insufficient protection against erosion. It includes activities such as excessive gathering of fuel wood, fodder, (local) timber, fencing material, removal of fodder, etc.

**Overgrazing:** usually leads to a decrease in plant cover, a change to lower quality fodder, and/or soil compaction. This may in turn cause reduced soil productivity and water or wind erosion. It includes excessive numbers of livestock, trampling along animal paths, etc.

**Industrial activities and mining:** this category includes all adverse effects arising from industrialisation and extractive activities. It includes release of airborne pollutants, mining, waste deposition, etc.

**Urbanisation and infrastructure development:** includes all adverse effects arising from industrialisation and extractive activities, such as loss of land resources and their functions for agriculture, water recharge, etc. It can cause considerable runoff and erosion, as well as other types of degradation. It includes land used for settlements / roads, (urban) recreation, etc.

**Discharges:** leading to point contamination of surface and ground water resources and includes discharge of effluents, waste water, sanitary sewage disposal, etc.

**Release of airborne pollutants (urban/industry):** can lead to contamination of vegetation / crops and soil or to a contamination of surface and ground water resources, etc.

**Disturbance of the water cycle:** leading to accelerated changes in the water level of ground water aquifers, lakes and rivers (improper recharge of surface and ground water) due to lower infiltration rates / increased surface runoff, etc.

**Over abstraction / excessive withdrawal of water:** mainly for agriculture / irrigation due to growing irrigation demand, decreasing water use efficiency, industrial and domestic use, etc

#### Direct causes (natural)

**Natural causes:** many occurrences of erosion and other degradation types are not caused by human activities, eg natural landslides in steep mountain areas, damage by strong wind in deserts, damage through extreme rainfall events, etc. Although WOCAT places the emphasis on human-induced degradation, natural causes may be indicated as well. However, soils that have unfavourable characteristics by nature (or since a considerable period of time), such as sandy desert soils or natural saline soils, are not considered as degraded. They include extreme topography / relief, excess winds and rains, floods, droughts, etc.

#### Indirect causes

**Population pressure:** density of population can be a driving force for degradation. High population density may trigger or enhance degradation, eg by competing for scarce resources or ecosystem services, but a low population density may also lead to degradation for instance where it leads to a lack of labour force.

**Land tenure:** poorly defined tenure security / access rights may lead to land degradation, as individual investments in maintenance and enhancement can be captured by others and land users do not feel "owner" of the maintenance investments. Tenure systems are particular important factors when conservation practices have a long lag between investment and return, such as terracing and tree planting.

**Poverty / wealth:** poor people cannot afford to invest in resource conserving practices, so instead they continue to use inappropriate farming practices (such as ploughing up hillsides and overgrazing), which again will lead to increased land degradation and worsen poverty. It needs to be assessed whether poverty plays a role in land degradation.

**Labour availability:** shortage of rural labour (eg through migration, prevalence of diseases) can lead to an abandoning of traditional resource conservation practices such as terrace maintenance. Off-farm employment opportunities may on the other hand help to alleviate pressure on production resources, in a sense that land users can invest more in conservation infrastructure as income increases.

**Inputs and infrastructure** (roads, markets, distribution of water points, etc): inaccessibility to, or high prices for key agricultural inputs such as fertilizers, may render it difficult or unprofitable to preserve soil fertility or water resources. Access to markets and prices. Good infrastructure may improve this. On the other hand: a road through a forest can lead to overexploitation and degradation.

**Education, access to knowledge and support services:** investing in human capital is one of the keys in reducing poverty (and thus land conservation practices). Educated land users are more likely to adopt new technologies. Land users with education often have higher returns from their land. Education also provides off-farm labour opportunities.

**War and conflicts:** leading to reduced options to use the land

**Governance / institutional:** laws and enforcements, organization, collaboration and support: government induced interventions may set the scene and be indirect drivers for implementation of conservation interventions.
